1 A next generation approach to species delimitation reveals the role of hybridization in a cryptic  
2 species complex of corals

3

4

5 Andrea M. Quattrini<sup>1\*</sup>, Tiana Wu<sup>1</sup>, Keryea Soong<sup>2</sup>, Ming-Shiou Jeng<sup>3</sup>, Yehuda Benayahu<sup>4</sup>,  
6 Catherine S. McFadden<sup>1</sup>

7

8

9 <sup>1</sup> Harvey Mudd College, Biology Department, 1250 N. Dartmouth Ave, Claremont CA 91711

10 <sup>2</sup> Institute of Marine Biology, National Sun Yat-sen University, Kaohsiung, Taiwan

11 <sup>3</sup> Biodiversity Research Center, Academia Sinica, Taipei, Taiwan

12 <sup>4</sup> School of Zoology, George S. Wise Faculty of Life Sciences, Tel Aviv University, Ramat Aviv,  
13 69978, Israel

14

15 Email addresses: AMQ: [aquattrini@g.hmc.edu](mailto:aquattrini@g.hmc.edu), TW: [8timowu@gmail.com](mailto:8timowu@gmail.com), KS:  
16 [keryea@mail.nsysu.edu.tw](mailto:keryea@mail.nsysu.edu.tw), MSJ: [jengms@gate.sinica.edu.tw](mailto:jengms@gate.sinica.edu.tw), YB: [yehudab@tauex.tau.ac.il](mailto:yehudab@tauex.tau.ac.il),  
17 CSM: [mcfadden@g.hmc.edu](mailto:mcfadden@g.hmc.edu)

18 \*Corresponding Author

19

20

21

22 Running Title: Species delimitation in *Sinularia*

23

24

25

26 **Abstract**

27 **Background:** Our ability to investigate processes shaping the evolutionary diversification of

28 corals (Cnidaria: Anthozoa) is limited by a lack of understanding of species boundaries.

29 Discerning species has been challenging due to a multitude of factors, including homoplasious

30 and plastic morphological characters and the use of molecular markers that are either not

31 informative or have not completely sorted. Hybridization can also blur species boundaries by

32 leading to incongruence between morphology and genetics. We used traditional DNA barcoding

33 and restriction-site associated DNA sequencing combined with coalescence-based and allele-

34 frequency methods to elucidate species boundaries and simultaneously examine the potential role

35 of hybridization in a speciose genus of octocoral, *Simularia*.

36 **Results:** Species delimitations using two widely used DNA barcode markers, *mtMutS* and 28S

37 rDNA, were incongruent with one another and with the morphospecies identifications, likely due

38 to incomplete lineage sorting. In contrast, 12 of the 15 morphospecies examined formed well-

39 supported monophyletic clades in both concatenated RAxML phylogenies and SNAPP species

40 trees of >6,000 RADSeq loci. DAPC and Structure analyses also supported morphospecies

41 assignments, but indicated the potential for two additional cryptic species. Three

42 morphologically distinct species pairs could not, however, be distinguished genetically. ABBA-

43 BABA tests demonstrated significant admixture between some of those species, suggesting that

44 hybridization may confound species delimitation in *Simularia*.

45 **Conclusions:** A genomic approach can help to guide species delimitation while simultaneously

46 elucidating the processes generating diversity in corals. Results support the hypothesis that

47 hybridization is an important mechanism in the evolution of Anthozoa, including octocorals, and

48 future research should examine the contribution of this mechanism in generating diversity across  
49 the coral tree of life.

50  
51 Keywords: hybridization, RADSeq, phylogenetics, coral reefs, taxonomy, Anthozoa,  
52 Octocorallia

53  
54  
55  
56 **Background**

57       The ability to delimit species is fundamental to the accurate assessment of biodiversity  
58 and biogeography, information that is essential for studying their biology as well as for  
59 implementing conservation policies. Yet this task is not trivial, as species are often difficult to  
60 discriminate for a multitude of reasons. Morphological traits have traditionally been used in  
61 classical taxonomy; however, use of characters that might not be diagnostic or are homoplasious  
62 can confound the interpretation of species boundaries. Cryptic species, particularly those that  
63 occur in sympatry, and species that have arisen via hybridization and introgression are often  
64 challenging to discriminate without genetic, ecological or behavioral data. DNA barcoding of  
65 mitochondrial genes has proven useful in many species groups (Hebert et al., 2004a, b), but  
66 incomplete lineage sorting and past hybridization events complicate species delimitation based  
67 on mitochondrial data alone, particularly in recently diverged taxa (Hickerson et al., 2006;  
68 Johnston et al., 2017; McFadden et al., 2017). In addition, mitochondrial markers reflect the  
69 history of maternal lineages, which are often incongruent with the species history (Currat et al.,  
70 2008; Rheindt & Edwards, 2011). The increased resolution of genomic data can potentially  
71 disentangle some of these issues, facilitating species delimitation while simultaneously  
72 furthering our understanding of processes that generate biodiversity (Sukumaran & Knowles,

73 2017). Moreover, such an approach may also provide a better evaluation of morphological traits  
74 and insights into their congruence with genetic data.

75 In sessile marine invertebrates, such as corals, congeners often occur in sympatry and  
76 occupy similar ecological niches and reef zones. These ecological characteristics combined with  
77 reproductive modes may lead to increased rates of hybridization among close relatives.  
78 Broadcast-spawning species that occur in sympatry often participate in synchronous, mass-  
79 spawning reproduction events (Babcock et al. 1986; Harrison et al., 1984; Kahng et al. 2011;  
80 Richmond & Hunter, 1990). Unless there are prezygotic mechanisms to reproductive isolation,  
81 such as gametic incompatibility or asynchronous spawning times, there may be numerous  
82 opportunities for hybridization to occur (van Oppen et al., 2002; Willis et al., 1997, 2006). In fact,  
83 laboratory crossings of sympatric congeners have produced viable hybrid offspring in several  
84 species (Slattery et al., 2008; Willis et al., 1997). Hybridization followed by reticulate evolution  
85 has been suggested to be an important mechanism generating the species diversity observed in  
86 some groups of corals (Combosch & Vollmer, 2015; Diekmann et al., 2001; Frade et al., 2010;  
87 Hatta et al., 1999; McFadden & Hutchinson, 2004; Miller & van Oppen, 2003; Richardson et al.,  
88 2008; van Oppen et al., 2001, 2002; Willis et al., 2006). Vollmer and Palumbi (2002), however,  
89 suggested that hybridization could yield distinct, new morphotypes that may be reproductively  
90 inviable or subject to hybrid breakdown. It is clear that further investigation is needed to  
91 determine the potential contributions of hybridization to speciation and morphological  
92 innovation in corals.

93 One particularly speciose group of octocorals (Cnidaria: Anthozoa: Octocorallia) is the  
94 genus *Sinularia* May, 1898. This zooxanthellate genus includes approximately 175 valid species  
95 (WoRMS Editorial Board 2018), 47 of them described just in the last 25 years. They are diverse

96 and abundant throughout the Indo-Pacific, and biodiversity surveys of shallow-water coral reef  
97 communities typically report more than 15 co-occurring species of *Sinularia*, with as many as 38  
98 species recorded at some locations (Manuputty & Ofwegen, 2007; Ofwegen, 2002, 2008).  
99 *Sinularia* species are typically most abundant on reef flats and shallow slopes, where single- or  
100 multi-species assemblages may dominate the reef substrate (Benayahu, 1995; Benayahu & Loya,  
101 1977; Dinesen, 1983; Fabricius, 1998; Tursch & Tursch, 1982). *Sinularia* can also play an active  
102 role in reef biogenesis through deposition of spiculite formed by the cementation of layers of  
103 calcitic sclerites (Jeng et al., 2011; Shoham et al. in press). In addition, many *Sinularia* species  
104 produce secondary metabolites used for allelopathy and predator deterrence (Slattery et al., 1999,  
105 2001; van Alstyne et al., 1994; Wylie & Paul, 1989), making the genus a rich and diverse source  
106 of bioactive natural products (e.g., Blunt et al., 2016).

107         Because of the dominance and importance of *Sinularia* species across a wide depth  
108 gradient (Shoham & Benayahu, 2017) as well as their susceptibility to bleaching-induced  
109 mortality (Bruno et al., 2001; Fabricius, 1999; Goulet et al., 2006; Marshall & Baird, 2000), it is  
110 of a great interest to better understand their ecology and function on the reefs. Ecological studies,  
111 however, are often hampered by the uncertainty of species identifications (McFadden et al.,  
112 2009). Classical taxonomy of *Sinularia* species is based primarily on morphological features of  
113 the colony and the shape and dimension of sclerites (microscopic calcitic skeletal elements)  
114 found in different parts of the colony (Fabricius & Alderslade, 2001; McFadden et al., 2009;  
115 Verseveldt, 1980). Separation of species using these characters can be subjective, as the complex  
116 morphologies of both colonies and sclerites are rarely quantified (Aratake et al., 2012; Carlo et  
117 al., 2011). There is also a potential contribution of environmental plasticity to the morphological

118 variation observed, as has been documented in other octocorals (Kim et al., 2004; Rowley et al.,  
119 2015; Sánchez et al., 2007).

120         The application of molecular systematic and DNA barcoding approaches to the study of  
121 species boundaries in *Sinularia* have been only partially successful (McFadden et al., 2009).  
122 While molecular approaches have revealed that some well-known morphospecies comprise  
123 cryptic species complexes (Ofwegen et al., 2013, 2016), it is also the case that numerous  
124 morphologically distinct *Sinularia* species share identical haplotypes at barcoding loci  
125 (Benayahu et al., 2018; McFadden et al., 2009, 2014). Because mitochondrial genes evolve  
126 slowly in Anthozoa (Huang et al., 2008; Shearer & Coffroth, 2008), these markers often simply  
127 lack the resolution to distinguish recently diverged species (McFadden et al., 2011, 2014). As a  
128 result, it is often not possible to conclude with certainty whether morphologically distinct  
129 individuals that share identical DNA barcodes represent different octocoral species or  
130 morphological variants of a single species. In addition, the reported ability of some species of  
131 *Sinularia* to hybridize in the laboratory (Slattery et al., 2008), raises the possibility that naturally  
132 occurring hybridization events could contribute to the observed morphological diversity of this  
133 genus, as has been suggested for stony corals (Richards et al., 2008). The true identity of some  
134 *Sinularia* species remains uncertain, and our ability to explore the evolutionary processes leading  
135 to diversification of this hyperdiverse lineage are limited by a lack of understanding of species  
136 boundaries. In fact, we have a limited understanding of species boundaries for numerous groups  
137 of recently diverged corals (e.g., Johnston et al., 2017; McFadden et al., 2017; van Oppen et al.,  
138 2000).

139         Octocoral biodiversity surveys conducted recently at Dongsha Atoll, Taiwan, recorded 27  
140 nominal morphospecies of *Sinularia* inhabiting the reef slope down to a depth of 20 m

141 (Benayahu et al., 2018), most of them belonging to the speciose clades “4” and “5C” (McFadden  
142 et al., 2009). These two clades include several subclades each characterized by a different suite  
143 of morphological characters whose diagnosis is quite confusing (McFadden et al., 2009). While  
144 most of these morphospecies could be distinguished using a character-based mitochondrial gene  
145 barcode (*mtMutS*), five distinct morphospecies in clade 5C shared identical haplotypes, and  
146 several morphospecies in both clades were represented by more than one haplotype (Benayahu et  
147 al., 2018). These morphospecies exemplify a problem common to many corals and raise the  
148 following questions: (1) do the observed morphological differences reflect boundaries between  
149 species whose mitochondrial haplotypes have not yet diverged or coalesced, or do these  
150 differences reflect intraspecific variation? and (2) might the sharing of mitochondrial haplotypes  
151 among distinct morphotypes reflect ongoing or past hybridization events?

152 To further explore these questions and to elucidate species boundaries in the *Sinularia*  
153 that co-occur on Dongsha Atoll, we have (1) sequenced an additional, nuclear marker (28S  
154 rDNA) that has been shown to be comparable to *mtMutS* as a species-specific barcode for  
155 *Sinularia* and other octocoral taxa (McFadden et al., 2014); and (2) sequenced restriction-site  
156 associated DNA (RADseq) to identify SNPs for multilocus species delimitation analyses using  
157 allele-frequency and coalescence-based approaches. Expanding upon a recent study of co-  
158 occurring *Sinularia* species at Dongsha Atoll (Benayahu et al., 2018), we validate morphospecies  
159 identifications using a genomic approach, and provide insight into the possible role of  
160 hybridization in the evolution of the genus.

161

## 162 **Results**

### 163 *Species Delimitation using DNA Barcodes*

164 Neither the *mtMutS* (735 bp) nor the *28S rDNA* (764 bp) barcoding marker delimited all  
165 morphospecies of *Simularia* when considered separately (Fig. 2). Phylogenetic relationships  
166 among morphospecies were poorly resolved with low support values and few reciprocally  
167 monophyletic groups, especially in clade 5C (Suppl. Fig. 1). Based on a 0.3% genetic distance  
168 threshold, the *mtMutS* barcode identified six molecular operational taxonomic units (MOTUs)  
169 among the four morphospecies belonging to clade 4, splitting *S. tumulosa* and *S. ceramensis* into  
170 two MOTUs each (Fig. 2a). In contrast, *28S rDNA* (0.3% threshold) delimited only four MOTUs  
171 within clade 4, each of them congruent with morphospecies identifications. The only exception  
172 was *S. verruca* (R41341) from Palau, included as a taxonomic reference, whose *mtMutS* and *28S*  
173 sequences were identical to those of *S. tumulosa*.

174 Among the clade 5C morphospecies, *mtMutS* delineated eight MOTUs (Fig. 2b). With  
175 just two exceptions (D442, Z34695), *mtMutS* differentiated *S. maxima*, *S. wanannensis*, *S.*  
176 *lochmodes* and *S. densa* from all other morphospecies (Fig. 2b). A majority of the colonies  
177 identified as *S. penghuensis* and *S. slieringsi*, both individuals of *S. exilis*, and seven of eleven *S.*  
178 *acuta*, however, belonged to a single MOTU, while the remaining four individuals of *S. acuta*  
179 were assigned to a separate MOTU. Two individuals with divergent haplotypes (*S. penghuensis*  
180 D002 and *S. slieringsi* D439) were each assigned to unique MOTUs.

181 In contrast to *mtMutS*, *28S* delineated only four MOTUs within clade 5C (Fig. 2b). *S.*  
182 *penghuensis* and *S. slieringsi*, which were not separated using *mtMutS*, were separated into two  
183 distinct MOTUs; four of the *S. penghuensis* colonies belonged to a MOTU that was well  
184 separated from all others, while the other five—including the holotype (Z34706) and both  
185 paratypes—shared identical genotypes with *S. slieringsi*. A third MOTU included *S. acuta*, *S.*



186 *densa* and *S. lochmodes* along with *S. abrupta* and one *S. exilis*. The fourth MOTU included all  
187 individuals of *S. maxima* and *S. wanannensis* plus the second *S. exilis*.

188 Several other colonies also had *mtMutS* or *28S* genotypes that were not consistent with  
189 their morphospecies identity. The holotype of *S. daii* from Penghu (Z34665) had *mtMutS* and  
190 *28S* sequences identical to those of some *S. penghuensis*. Among the three colonies identified as  
191 *S. abrupta*, D329 had a *mtMutS* sequence matching *S. wanannensis* but a *28S* sequence matching  
192 *S. acuta*; Z33623 (from Penghu) had a *mtMutS* sequence matching *S. acuta* but its *28S* matched *S.*  
193 *densa*; and D019 was identical to *S. acuta* at both loci. The holotype of *S. wanannensis* from  
194 Penghu (Z34695) had a *28S* sequence consistent with other individuals of that species, but shared  
195 a *mtMutS* haplotype with *S. penghuensis* and *S. slieringsi* (Fig. 2b).

196

#### 197 *RADSeq Data Statistics*

198 A total of 289,373,374 reads were obtained for 95 *Sinularia* samples. After trimming in  
199 both Stacks and pyRAD, 86% of reads were retained (247,873,622). The mean number of reads  
200 per individual was  $2,609,196 \pm 627,314$ . For each clade, the number of loci and the number of  
201 SNPs obtained increased considerably when the number of shared heterozygous sites ( $p$ ) was  
202 increased and both the clustering threshold ( $c$ ) and individual occupancy per locus ( $m$ ) were  
203 decreased (Table 2). Notably, a substantial increase in both the number of loci and SNPs  
204 obtained occurred when  $p$  was set to 0.25 at a clustering threshold ( $c$ ) of 0.85. The number of  
205 loci obtained ranged from 73 to 28,179 for clade 4 and 115 to 23,946 for clade 5C depending  
206 upon parameters used in pyRAD analyses (Table 2). The number of variable SNPs obtained  
207 ranged from 382 to 251,615 for clade 4 and 885 to 329,837 for clade 5C (Table 2).

208

## 209 *Phylogenetic Inference and Species Delimitation*

210 In contrast to the *mtMutS* and *28S rDNA* trees (Suppl. Fig. 1), a majority of the identified  
211 morphospecies formed well-supported monophyletic clades in both clade 4 and 5C phylogenies  
212 constructed with the *c* 0.85, *p* 0.25, and *m* 0.75 RADSeq datasets (clade 4: 6,343 loci, clade 5C:  
213 8,060 loci; Figs. 3-4). The maximum clade credibility species trees produced from SNP data in  
214 the SNAPP analyses were largely congruent with the RAxML trees generated from concatenated  
215 data (Fig. 5). However, in clade 4, *S. pavidata* and *S. ceramensis* were reciprocally monophyletic  
216 in the ML tree but not in the maximum clade credibility SNAPP species tree, although this  
217 relationship was evident in 30% of the alternative SNAPP tree topologies (in red, Fig. 5A). In  
218 clade 5C, *S. acuta* was sister to *S. penghuensis* and *S. slieringsi* in the ML tree, but not in the  
219 maximum clade credibility species tree, although this relationship was evident in 25% of the  
220 alternative SNAPP tree topologies (in red and green, Fig. 5B). For clade 4, 35% of the SNAPP  
221 trees obtained were alternative topologies to the maximum clade tree and 37% of trees had  
222 different topologies compared to the maximum clade credibility tree for clade 5C (Fig. 5).

223

### 224 *Clade 4*

225 Species delimitation analyses agreed with the currently defined morphospecies in  
226 *Sinularia* clade 4 (*S. ceramensis*, *S. humilis*, *S. pavidata*, and *S. tumulosa*), and with the four  
227 MOTUs identified by the *28S rDNA* barcoding marker (Fig. 2a). Consistent with the barcoding  
228 results, *S. verruca* was genetically indistinguishable from *S. tumulosa*. The optimal number of *K*  
229 clusters suggested by the DAPC analyses was four (BIC=120.4, Suppl. Fig. 2), and the DAPC  
230 plot revealed no overlap among these four distinct clusters (Fig. 6a). Further support for group  
231 assignment can be seen in the assignment plots, as all individuals were successfully re-assigned

232 into their respective clusters (Suppl. Fig. 3). In addition, the Distruct plot clearly illustrated little  
233 to no admixture among these four species (Fig. 3). Upon further Structure analysis, little to no  
234 admixture was also revealed between two sub-clades of *S. tumulosa* (Fig. 3), suggesting that *S.*  
235 *tumulosa* might consist of two species. Other methods also support this result. First, following a  
236 one-species model (MLE=-1119), DAPC+1 was the second most likely (MLE=-1291) species  
237 model according to BFD\* analyses (Table 3). The DAPC+1 model included species denoted by  
238 DAPC, plus two sub-clades of *S. tumulosa*. Second, most of the individuals of these two sub-  
239 clades formed two separate groupings in the DAPC plot, although there was some overlap  
240 among individuals (Fig. 6a). Finally, *S. tumulosa* was divided into two well-supported,  
241 reciprocally monophyletic clades (sp. a and b) in both concatenated and species tree phylogenies,  
242 which match the *mtMutS* results (Figs. 2a, 3 and 5a). It is possible that these represent two  
243 cryptic species.

244 Twenty-four separate ABBA-BABA tests were performed on clade 4 (Fig. 7, Suppl. File  
245 1). The average number of loci shared across taxa in each test was  $3313 \pm 556$  (Suppl. File 2).  
246 The ABBA-BABA tests indicated admixture between *S. tumulosa* and *S. pavidata* lineages ( $\alpha=3.0$ ,  
247  $Z= 3.44-4.10$ ,  $D=0.11$ ; tests 10, 18). Eleven of thirteen individuals of *S. tumulosa* (both clades a  
248 and b) appeared to be strongly admixed with *S. pavidata* ( $\alpha=3.0$ ,  $Z=3.11-4.55$ ,  $D=0.11-0.18$ ; tests  
249 11, 14-17, 19-24, Suppl. File 2). Upon further examination with partitioned D-statistics,  
250 introgression appeared to have occurred from *S. pavidata* into both *S. tumulosa* clades ( $\alpha=3.0$ ,  $Z =$   
251  $2.8-3.0$ ,  $D=-0.14-0.15$ , Suppl. File 2).

252

253 *Clade 5C*

254 Species delimitation analyses supported eight species in *Sinularia* clade 5C (*S.*  
255 *acuta/abrupta*, *S. densa*, *S. exilis*, *S. lochmodes*, *S. maxima*, *S. penghuensis/daii*, *S. slieringsi*, and  
256 *S. wanannensis*); *S. abrupta* was not distinguished from *S. acuta*, and the holotype of *S. daii* was  
257 placed with *S. penghuensis*. In addition, five individuals identified as *S. penghuensis*, including  
258 the holotype and paratypes, grouped with *S. slieringsi*. The optimal number of *K* clusters  
259 suggested by the DAPC analyses was eight (BIC=377, Suppl. Fig. 2), and the DAPC plot  
260 revealed no overlap among these distinct clusters (Fig. 6b). Further support for group assignment  
261 can be seen in the assignment plots, as all individuals were successfully re-assigned into their  
262 respective clusters (Suppl. Fig. 4). In addition, the Distruct plot clearly illustrated little to no  
263 admixture between these eight species (Fig. 4), except that both individuals of *S. exilis* appeared  
264 to be admixed with at least three different species, including *S. densa*, *S. maxima*, and *S.*  
265 *wanannensis*. Individuals of *S. abrupta* (D329) and the holotype of *S. wanannensis* (Z34695)  
266 whose 28S barcode sequences were incongruent with their *mtMutS* haplotypes (Fig. 2b) also  
267 showed some evidence of admixture with *S. maxima* and *S. densa*, respectively.

268 It is possible that *S. slieringsi* represents two cryptic species, although results are not  
269 conclusive. Upon further Structure analysis, little to no admixture was revealed between two  
270 sub-clades of *S. slieringsi*; however, two individuals (one of them a paratype of *S. penghuensis*,  
271 Z34681) were admixed (Fig. 4). Following a one-species model (MLE=-1298), DAPC+1 was the  
272 second most likely (MLE=-1543) species model according to BFD\* analyses (Table 3). The  
273 DAPC+1 model included species designated by DAPC, plus the two groups of *S. slieringsi*.  
274 Second, individuals of *S. slieringsi* formed two separate groupings in the DAPC plot, although  
275 there was some overlap among individuals (Fig. 6b). *S. slieringsi* also split into two reciprocally

276 monophyletic clades in the species tree phylogeny (Fig. 5b), but not in the concatenated RAxML  
277 phylogeny (Fig. 4).

278 Fifty separate ABBA-BABA tests were run on clade 5C (Fig. 8, Suppl. File 1). The  
279 average number of loci shared across taxa in each test was  $1745 \pm 216$  (Suppl. File 2). The  
280 ABBA-BABA tests indicated admixture between the *S. penghuensis*/*S. daii* clade and one clade,  
281 clade b, of *S. slieringsi* ( $\alpha=3.0$ ,  $Z$  scores =4.51,  $D=-0.15$ ; test 14). Most individuals in the latter  
282 clade (which included the holotype of *S. penghuensis*) appeared to be strongly admixed as  
283 evidenced by ABBA-BABA tests ( $\alpha=3.0$ ,  $Z=3.1-5.5$ ,  $D=-0.13-0.20$ ; tests 15, 19-26, 28). As  
284 suggested by the Structure analysis, the holotype of *S. wanannensis* (Z34695) showed strong  
285 admixture with *S. densa* ( $\alpha=3.0$ ,  $Z=3.13$ ,  $D=0.14$ ; test 9), but not with *S. maxima* ( $\alpha=3.0$ ,  $Z=0.25$ ,  
286  $D=-0.01$ ; test 2). It was also not admixed with either *S. penghuensis* or *S. slieringsi* ( $\alpha=3.0$ ,  
287  $Z=0.24-0.61$ ,  $D=-0.03-0.01$ ; tests 46-47), even though it shared the same *mtMutS* haplotype as  
288 both of those species. Although *S. abrupta* D329 showed some evidence of admixture with *S.*  
289 *maxima* and *S. densa* in the Structure analysis, the ABBA-BABA tests indicated that it was not a  
290 hybrid ( $\alpha=3.0$ ,  $Z=1.59-2.78$ ,  $D=0.10-0.18$ ; tests 32, 45). The *S. abrupta* specimen Z33623 that  
291 shared a *28S* sequence with *S. densa* was also not significantly admixed with that species ( $\alpha=3.0$ ,  
292  $Z=2.11$ ,  $D=0.13$ , test 44), whereas *S. abrupta* D19 was ( $\alpha=3.0$ ,  $Z=3.12$ ,  $D=0.15$ ; test 40). One  
293 individual of *S. acuta*, D450, was also admixed with *S. densa* ( $\alpha=3.0$ ,  $Z=3.21$ ,  $D=0.16$ ; test 37).  
294 Notably, the Distruct plot showed strong admixture of the two *S. exilis* specimens with *S. densa*,  
295 *S. maxima*, and *S. wanannensis* (Fig. 4). However, ABBA-BABA tests suggested that these  
296 individuals were not significantly introgressed with those or any other species ( $\alpha=3.0$ ,  $Z=0.25-$   
297  $2.96$ ,  $D=-0.15-0.04$ ; tests 0-2, 5-6, 8, 48-49). Overall, the ABBA-BABA tests indicated that at  
298 least 14 individuals were significantly introgressed with other species at an  $\alpha=3.0$ ; however, we

299 note that D statistics for several other tests also deviated considerably from 0, although they were  
300 not significant at  $\alpha=3.0$ .

301

## 302 **Discussion**

### 303 *Species Delimitations*

304 The different species delimitation methods based on RADseq data resulted in  
305 incongruence in the number of species suggested to be present among those sampled at Dongsha  
306 Atoll in each of *Simularia* clades 4 and 5C. BFD\* analysis indicated that for each clade the most  
307 likely model was a one-species model, whereas DAPC indicated that four species were present in  
308 clade 4 and eight were present in clade 5C. It seems unlikely that only a single species exists in  
309 each of clades 4 and clade 5C because there is little overlap among groups in the DAPC plots  
310 and there is strong genetic structure shown in the Structure analyses. Furthermore, there are well-  
311 supported clades in both ML and species trees, many of them congruent with distinct  
312 morphologies (Benayahu et al., 2018). The suggestion by BFD\* analysis of only one species in  
313 each of the two clades is likely spurious due to the relatively few loci included in those analyses.  
314 Because of the computational time it took to run each SNAPP species-delimitation model, only  
315 complete datasets were used, i.e., those that included no missing data, and these contained  
316 relatively few SNPs (< 200).

317 All other species delimitation analyses supported four or five species of *Simularia* in  
318 clade 4 and eight or nine in clade 5C among the samples that were sequenced. Within clade 4,  
319 RADseq and both barcoding markers discriminated *S. humilis*, *S. ceramensis* and *S. pavida* from  
320 one another and from all specimens identified as *S. tumulosa*. Both the *mtMutS* barcode and  
321 RADseq results further delineated two distinct clades within *S. tumulosa*, with hybridization tests

322 suggesting that both are admixed with *S. pavida*. Within clade 5C, species delimitation analyses  
323 clearly distinguished *S. lochmodes*, *S. densa*, *S. wanannensis* and *S. maxima* from all other  
324 species, and each of those morphospecies also had unique haplotypes at both barcoding loci. *S.*  
325 *acuta* was similarly delineated from all other morphospecies with the notable exception of *S.*  
326 *abrupta*. Two of three individuals of *S. abrupta* shared a *mtMutS* haplotype with *S. acuta*, and  
327 could not be distinguished from that species in the DAPC and Structure analyses. A third colony  
328 identified as *S. abrupta* (D329) showed signs of admixture in both Structure and ABBA-BABA  
329 analyses, suggesting a possible hybrid origin. As *S. acuta* and *S. abrupta* differ markedly in both  
330 colony growth form and sclerite morphology (Benayahu et al., 2018), the apparent lack of  
331 genetic distinction between these two morphospecies warrants further study.

332         The remaining morphospecies in clade 5C could not be separated clearly using either  
333 barcode marker, and the multilocus analyses suggested that admixture may contribute to the  
334 difficulty distinguishing them. Although both individuals of *S. exilis* had unique *mtMutS*  
335 haplotypes, they shared 28S genotypes with *S. densa* and *S. wanannensis*. Phylogenetic analyses  
336 placed *S. exilis* as the sister to *S. wanannensis*, but Structure suggested considerable admixture  
337 with both *S. maxima* and *S. densa*. As ABBA-BABA tests did not strongly support a hybrid  
338 origin of *S. exilis*, incomplete lineage sorting may better explain why this species shares  
339 genotypes with other species in the clade. Hybridization was, however, supported as a possible  
340 explanation for the confusing relationship between *S. penghuensis* and *S. slieringsi*, two  
341 morphospecies that shared several different *mtMutS* haplotypes, one of which was also shared by  
342 *S. daii*. Five colonies of *S. penghuensis*, including the holotype (ZMTAU Co34706) and two  
343 paratypes (ZMTAU Co3464, Co34681), shared a 28S genotype with *S. slieringsi*, while the other  
344 four shared a very different 28S genotype with the holotype of *S. daii* (ZMTAU Co 34665).

345 Multilocus species delimitation analyses separated the latter four *S. penghuensis* plus *S. daii*  
346 from a large clade that included all *S. slieringsi* plus the *S. penghuensis* type specimens.  
347 Structure and DAPC further separated that large clade into two sub-clades, suggestive of possible  
348 cryptic species. ABBA-BABA tests indicated that a majority of the individuals of *S. slieringsi*  
349 and *S. penghuensis* in one of those two sub-clades are admixed with the *S. penghuensis*-*S. daii*  
350 clade.

351

### 352 *Evidence for Hybridization in Sinularia*

353 It is important to use a phylogenetic framework in assessments of introgressive  
354 hybridization. A species that appears admixed could have a close relative harboring a stronger  
355 signal of admixture (Eaton et al., 2015), and if that species is not included in analyses, then the  
356 admixture will be incorrectly attributed to a closely-related taxon (Durand et al., 2011; Eaton &  
357 Ree, 2013; Rogers & Bohlender, 2015). In addition, it can be challenging to distinguish  
358 introgression between two species from “secondary genomic admixture”, which occurs when one  
359 species shares recent ancestry with a true hybridizing lineage, thus causing that species to also  
360 appear as if it were admixed (Eaton & Ree, 2013; Eaton et al., 2015). Although the current study  
361 sequenced most of the clade 4 and 5C morphospecies that occur at Dongsha Atoll, there were at  
362 least two morphospecies in each clade that were not included in the analyses. In addition, there  
363 are other *Sinularia* species in phylogenetically distinct clades that also inhabit this atoll, and  
364 these too were not included in the analyses. While our results provide evidence for hybridization,  
365 we acknowledge the possibility of incorrectly attributing admixture to a close relative of the true  
366 hybridizing lineage, as not all possible *Sinularia* morphospecies were included in these analyses.



367           Because of the difficulties interpreting ABBA-BABA tests even when using a  
368 phylogenetic framework (Eaton et al., 2015), it is best to focus on the strongest signals of  
369 admixture (Eaton, 2018). The signal of introgression was strong in clade 4, with both clades of *S.*  
370 *tumulosa* showing admixture with *S. pavidata*; no other hybridization tests in this clade were  
371 significant, with D-statistics centered around zero and Z scores fairly low. In contrast, it was a bit  
372 more difficult to confidently determine which *Sinularia* species are hybridizing with others in  
373 clade 5C, and perhaps this is due to the use of an incomplete phylogeny. There were some cases  
374 where the signal of admixture was strong (e.g., *S. acuta* with *S. densa*, *S. slieringsi* with *S.*  
375 *penghuensis*) and supported by other tests in addition to ABBA-BABA. However, there were  
376 also cases where species appeared admixed, but the ABBA-BABA results were not significant at  
377 an alpha of 3.0. For example, Structure analyses suggested there was considerable admixture  
378 between *S. wanannensis* and *S. exilis*, and at least one *S. exilis* individual had the same 28S  
379 barcode as *S. wanannensis*, but the ABBA-BABA tests were not significant. Perhaps with more  
380 *S. exilis* individuals in the analyses, or with the addition of the missing morphospecies of  
381 *Sinularia*, a more complete picture would emerge of whether these species share genes as a result  
382 of incomplete lineage sorting or hybridization. Because the current phylogenetic analysis did not  
383 include all species, it is possible that the species identified as the source of introgressed alleles  
384 may simply be close relatives of the actual parental species. Nevertheless, the phylogenetic  
385 framework was a useful approach in determining that hybridization appears to be an important  
386 process contributing to the diversification of this speciose group of soft corals.

387           Incongruence between the RAxML and SNAPP species trees (both built using 25%  
388 missing data) may provide further support for hybridization among *Sinularia* species. In the  
389 clade 4 SNAPP species tree, *S. ceramensis* was sister to a clade of *S. pavidata* plus *S. tumulosa*,

390 whereas in the ML tree built using concatenated RAD loci, *S. ceramensis* was sister to *S. pavida*.  
391 In clade 5C, *S. acuta* was sister to *S. penghuensis* and *S. slieringsi* in the ML tree, but sister to all  
392 other species in the SNAPP species tree. Notably, relationships that differed between analyses  
393 showed evidence of admixture in the ABBA-BABA results. Although incomplete lineage sorting  
394 can lead to discordance between phylogenies built using concatenated data vs. species tree  
395 methods (Edwards et al., 2007; Kubatko & Degnan, 2007; Maddison, 1997), hybridization has  
396 also been shown to produce incongruence among gene trees (Edwards et al., 2007; Kubatko,  
397 2009). Introgressive hybridization may also explain the alternative topologies recovered in the  
398 SNAPP species tree. Johnston et al. (2017) suggested that alternative trees emerging from  
399 SNAPP analyses of corals in the genus *Porites* could be due to introgressive hybridization,  
400 incomplete lineage sorting, or contamination by loci of symbionts (e.g., Symbiodiniaceae). Our  
401 results, however, indicate that introgressive hybridization likely explains the discordance  
402 observed, as the species displaying different relationships in the SNAPP trees were suggested to  
403 be hybridizing. Results further lend support to the idea that diversification of species-rich  
404 lineages may not be a solely bifurcating process. As such, phylogenetic tree reconstructions that  
405 include taxa that do not follow the usual assumption of a bifurcating process of evolution can  
406 lead to incongruence among gene trees and contribute to difficulties in resolving phylogenies.

407

#### 408 *Morphospecies versus Genetic Data*

409         Incongruence between morphological and molecular evidence for species boundaries is  
410 common in corals (e.g., Forsman et al., 2009, 2010; Keshavmurthy et al., 2013). Contributing  
411 factors include environmental plasticity (e.g., Paz-García et al., 2015) and frequent homoplasy of  
412 morphological characters (e.g., Forsman et al., 2009) as well as the slow rate of mitochondrial

413 gene evolution that has made "universal" molecular barcodes such as COI relatively invariant  
414 among congeneric species (Huang et al., 2008; McFadden et al., 2011; Shearer & Coffroth,  
415 2008). When barcodes fail to discriminate distinct morphospecies it may be because the markers  
416 lack appropriate variation, or, alternatively, because morphological variation within a species has  
417 been incorrectly interpreted as evidence of a species boundary (McFadden et al., 2017). Attempts  
418 to integrate the two different sources of evidence have met with some success, as demonstrated  
419 by Benayahu et al. (2018). By combining assessment of morphology with a character-based  
420 barcoding approach, that study identified at least 27 species of *Sinularia* from Dongsha Atoll,  
421 including those used in the current study. In several cases in which distinct morphotypes shared  
422 identical *mtMutS* haplotypes, however, they attributed the lack of congruence to invariance of the  
423 barcode marker (i.e., incomplete lineage sorting), and delimited species using morphological  
424 characters. In two such cases, species delimitation methods using RADseq data also failed to  
425 support the genetic distinction between discrete morphotypes, namely *S. acuta* and *S. abrupta*,  
426 and *S. slieringsi* and *S. penghuensis*. Moreover, our inclusion of type specimens of *S.*  
427 *penghuensis* and *S. daii* as taxonomic references revealed no genetic distinction between the  
428 material identified here as *S. slieringsi* and the *S. penghuensis* types, or between the holotype of  
429 *S. daii* and additional colonies identified as *S. penghuensis*. In addition, a colony from Palau  
430 identified as *S. verruca* (R41341) could not be distinguished genetically from one of the two  
431 clades of *S. tumulosa*. Clearly, additional taxonomic work integrating both morphological and  
432 molecular approaches will be necessary to clarify the relationships among these taxa.

433 Morphological discrimination of species is complicated in *Sinularia* and many other soft  
434 corals due to the continuous nature of many of the characters used to diagnose species. Colony  
435 growth forms and the intricate shapes of sclerites are difficult to quantify and may present a

436 continuum of variation, as do morphometric characters such as the sizes of sclerites commonly  
437 used in the literature (e.g. Verseveldt, 1980). Many of the species examined here, including *S.*  
438 *tumulosa*, *S. verruca*, *S. acuta* and *S. daii*, were described from single exemplars (Benayahu &  
439 Ofwegen, 2011; Manuputty & Ofwegen, 2007; Ofwegen, 2008), and therefore no data exist on  
440 the possible range or limits of morphological variation they exhibit, potentially confounding  
441 efforts to discriminate them from other similar species. Hybridization also offers a possible  
442 explanation for the lack of congruence between morphological and molecular determinations of  
443 species identity. As has been suggested for some coral genera, hybridization can lead not only to  
444 morphologically distinct or intermediate phenotypes (*Porites*: Forsman et al., 2017; *Acropora*:  
445 van Oppen et al., 2000, 2002; Vollmer & Palumbi, 2002), but also to F1 hybrids that exhibit  
446 characters of both parental species (Slattery et al., 2008; Vollmer & Palumbi, 2002). In a  
447 naturally occurring hybrid zone in Guam, for example, F1 hybrids of *S. maxima* and *S.*  
448 *polydactyla* were found to contain a mix of sclerites resembling those of both parental species  
449 (Slattery et al., 2008). Perhaps mechanisms such as these add to the confusion in morphospecies  
450 identification, which is often pervasive in *Sinularia* and other octocorals. Although it is currently  
451 unknown whether or not hybridization generates new species or asexual lines in the genus  
452 *Sinularia*, admixture between *Sinularia* species occurs, and perhaps contributes to the range of  
453 morphotypes observed in the genus.

454

#### 455 *Utility of DNA Barcoding in Corals*

456 As numerous other studies have now cautioned, none of the single-gene molecular  
457 barcodes currently used to help guide species identifications in octocorals successfully delimit all  
458 species (Baco & Cairns, 2012; Herrera & Shank, 2016; McFadden et al., 2011, 2014; Pante et al.,

459 2015), particularly when genetic distance thresholds are used to decide species boundaries. For  
460 example, in *Sinularia* clade 5C only four MOTUs were identified among eight morphospecies  
461 using the *28S* marker, whereas *mtMutS* resolved eight MOTUs, but not all of them were  
462 congruent with morphospecies and RADSeq delimitations. Such lack of concordance among  
463 different molecular markers is not uncommon in corals and in recently diverged clades more  
464 generally (McFadden et al., 2014; Prada et al. 2014; Radice et al., 2016; van Oppen et al. 2001),  
465 a result that is likely due to incomplete lineage sorting. For octocorals, a consensus has emerged  
466 that mitochondrial and rDNA barcodes may be useful in species assessments for some taxa (e.g.,  
467 McFadden et al., 2014; Pante et al., 2015), but not all, and that multiple markers and other lines  
468 of evidence need to be considered when delimiting species (McFadden et al., 2017). Genomic  
469 approaches such as RADseq are effective (Herrera & Shank, 2016; Pante et al., 2015), but still  
470 prohibitively expensive and impractical to use for the routine species identification work  
471 required of biodiversity surveys. Alternatively, once species boundaries have been validated  
472 using such approaches, it may be possible to identify morphological or simple molecular  
473 characters that are species-diagnostic. As discussed above, however, the continuum of variation  
474 in morphological traits of corals complicates the search for diagnostic characters, and in some  
475 recently discriminated octocoral taxa none have yet been identified (McFadden et al., 2017).

476 Single-gene barcode markers such as *mtMutS* and *28S* offer diagnostic nucleotide  
477 characters that can be used to identify cryptic taxa (McFadden et al., 2011). When Benayahu et  
478 al. (2018) applied a character-based *mtMutS* barcode to the *Sinularia* species found at Dongsha,  
479 the only morphospecies that could not be discriminated were the same ones for which the current  
480 study also found incongruence between RAD clades and morphospecies designations: *S. acuta*, *S.*  
481 *abrupta*, *S. penghuensis*, *S. daii* and *S. slieringsi*. A compound, character-based barcode that

482 combines *mtMutS* with 28S, however, yields diagnostic characters that discriminate each of the  
483 *Sinularia* clades identified by RADseq, including both sub-clades of *S. tumulosa* and *S. slieringsi*  
484 (Suppl. Fig. 5). Once species boundaries have been validated using integrated, genomic  
485 approaches such as those applied here, use of simple character-based barcodes to identify  
486 morphologically cryptic species may be more time- and cost-effective than genomic approaches.  
487 Assignment of character-based barcodes, however, requires *a priori* recognition of species  
488 boundaries, as well as screening of a sufficient number of individuals to identify polymorphic  
489 characters.

490

#### 491 *Future Research Directions*

492 Further investigation is needed to determine the evolutionary processes responsible for  
493 generating the high species diversity in the genus *Sinularia*, but a necessary first step is to  
494 understand how many species there are and where they are distributed. With accurate species  
495 identifications utilizing both classical taxonomy and advanced genomic techniques, it will be  
496 possible to address questions pertaining to how and when *Sinularia* diversified into coral reef  
497 environments and why species in this genus appear to be so successful at co-existing on one reef.  
498 One example of an intriguing question is whether the high diversity of *Sinularia* was generated  
499 in sympatry through mechanisms such as hybrid speciation or whether species have diverged in  
500 allopatry and then colonized the same reefs. With the advent of new genomic techniques such as  
501 RADSeq and target-capture genomics (e.g., Quattrini et al., 2018), we can begin to examine how  
502 pervasive hybridization is on coral reefs, particularly because F1 hybrids and their progeny may  
503 be more fit than the parent populations, and hybrid vigor may help in the maintenance and  
504 resilience of coral reef diversity (Slattery et al., 2008). Using a genomic approach can help to

505 guide species delimitation while simultaneously shedding light on the processes generating  
506 diversity in this genus, just one of many hyperdiverse coral lineages (e.g., the scleractinians  
507 *Acropora*, *Porites*, *Pocillopora* and the octocorals *Dendronephthya*, *Lobophytum* and  
508 *Sarcophyton*) in which ecologically similar congeners co-occur in high numbers on coral reefs  
509 throughout the Indo-Pacific.

510

## 511 **Conclusions**

512 Delimiting species is a critical first step in documenting the biodiversity of ecologically  
513 important corals, such as species in the genus *Sinularia*. This study demonstrates the utility of  
514 using genomic approaches to delimit species within a hyperdiverse lineage of soft corals and to  
515 examine simultaneously whether hybridization may be contributing to its diversification.  
516 Although there was some incongruence among datasets and species delimitation methods, we  
517 can confidently conclude that the sequenced individuals represent at least four species of  
518 *Sinularia* in clade 4 and eight species in clade 5C (McFadden et al. 2009), with the potential for  
519 one additional cryptic species in each clade. The results point to hybridization as an important  
520 source of diversification in *Sinularia*, and suggest that this mechanism may produce hybrids with  
521 morphologies intermediate to those of their parental species, contributing to the difficulty of  
522 assigning species based on morphology in this and other coral genera (Forsman et al., 2017;  
523 Fukami et al., 2004; Miller & van Oppen, 2003; Slattery et al., 2008). Furthermore, our results  
524 raise the possibility that hybrid speciation (i.e., reticulate evolution via introgressive  
525 hybridization) is one mechanism that has contributed to the diversity of octocorals.

526

## 527 **Methods**

## 528 *Specimen Collection and Preparation*

529 Colonies of *Sinularia* were collected using SCUBA during biodiversity surveys  
530 conducted at Dongsha Atoll Marine National Park (Taiwan) in 2011, 2013 and 2015 (Benayahu  
531 et al., 2018). Collections were made at 13 sites in the shallow fore-reef zone (3-21 m)  
532 surrounding the 25-km diameter atoll (Fig. 1). During the 2015 survey we specifically targeted  
533 common morphospecies belonging to clades 4 and 5C (McFadden et al., 2009). Following  
534 collection, small subsamples of tissue were preserved in 95% EtOH, and the remainder of the  
535 specimen was preserved in 70% EtOH. All vouchers have been deposited in the Steinhardt  
536 Museum of Natural History, Tel Aviv University, Israel (ZMTAU, Suppl. File 3). To identify  
537 morphospecies, sclerites were isolated from colonies by dissolving tissue in 10% sodium  
538 hypochlorite and examined using either light microscopy or, when necessary, scanning electron  
539 microscopy (SEM) (Benayahu et al., 2018). The morphological IDs were made by direct  
540 comparison to type material when available. Specimens belonging to 13 *Sinularia*  
541 morphospecies, four from clade 4 and nine from clade 5C, were selected for further species  
542 delimitation analyses. Seven specimens collected in previous biodiversity surveys of the Penghu  
543 Archipelago, Taiwan (Benayahu et al., 2012) and Palau (McFadden et al., 2014), including  
544 original type material of *S. penghuensis* (ZMTAU Co34643, Co34706, Co34681), *S.*  
545 *wanannensis* (ZMTAU Co34695) and *S. daii* (ZMTAU Co34665), were also included as  
546 taxonomic references (Table 1; Suppl. File 3).

547 DNA was extracted from 95 *Sinularia* specimens, and quantified using a Qubit v 2.0  
548 fluorometer (Broad Range Assay Kit). Quality was assessed by running 100 ng of DNA for each  
549 sample on a 1% agarose gel, and checked with a Nanodrop spectrophotometer. Concentration of  
550 high-quality (230/260 and 260/280 ratios >1.8) DNA was normalized to 20 ng per ul and sent to



551 Floragenex Inc (Eugene, OR) for RADSeq library preparation. DNA libraries were constructed  
552 for each of the 95 samples using the 6-cutter *PstI* enzyme, and then split into two for sequencing  
553 100 bp SE reads on two full lanes of an Illumina HiSeq2500 (University of Oregon's Genomics  
554 and Cell Characterization Core Facility lab). In addition to RADseq, two gene regions (*mtMutS*,  
555 28S rDNA) used widely for barcoding in octocorals were PCR-amplified and Sanger-sequenced  
556 using published primers and protocols (McFadden et al., 2011, 2014).

557

#### 558 *Phylogenetic Inference and Species Delimitation using DNA Barcodes*

559 *mtMutS* and 28S sequences of the *Simularia* species were each aligned using the L-INS-i  
560 method in MAFFT (Kato & Toh, 2008), and pairwise genetic distances (Kimura 2-parameter)  
561 among sequences were calculated using the DNADist program in PHYLIP v. 3.69 (Felsenstein,  
562 2005). MOTHUR v 1.29 (Schloss et al., 2009) was used to delimit molecular operational  
563 taxonomic units (MOTUs) based on a genetic distance threshold of 0.3% applied separately to  
564 *mtMutS* and 28S (e.g., McFadden et al., 2014). Phylogenetic trees were constructed separately  
565 for *mtMutS* and 28S rDNA using maximum likelihood methods (Garli; Zwickl, 2006) (Suppl. Fig.  
566 1). jModelTest (Darriba et al., 2012) was used to identify the best models of evolution (AIC  
567 criterion) to use in these analyses (*mtMutS*: HKY + G; 28S rDNA: HKY + I).

568

#### 569 *Phylogenetic Inference and Species Delimitation using RADSeq Data*

570 We produced several different RADSeq locus datasets from the *Simularia* material (Suppl.  
571 Files 4-5; all tree files on datadryad). Datasets chosen for species delimitation and phylogenetic  
572 analyses included those loci from pyRAD parameter settings that maximized the number of  
573 phylogenetically informative sites and reduced the chances for including paralogous loci (Table

574 2). Thus, for most analyses, we used data produced from the following parameter settings:  $c$  0.85,  
575  $p$  0.25, and  $m$  0.75 for each of clades 4 and 5C.

576 RAxML v8 (Stamatakis, 2006) was used to create maximum likelihood (ML)  
577 phylogenies for clades 4 and 5C. A GTR+G+I model as suggested by the Akaike Information  
578 Criterion [(AIC=371918), JModelTest v2, Darriba et al., 2012] was used. A total of 20 ML  
579 searches and 200 bootstrap replicates were performed using rapid bootstrapping on concatenated  
580 loci. RAxML analyses were performed (12 analyses per clade) for each of the different datasets  
581 produced by pyRAD with different parameter combinations and clustering thresholds (Table 2,  
582 Suppl. Files 4-5).

583 Discriminant Analysis of Principal Components (DAPC) was performed using the  
584 package 'adegenet' v2.0 in R (Jombart & Collins, 2015; R Core Team, 2012) to explore genetic  
585 structure in both clades 4 and 5C. The DAPC method, used previously in species delimitation  
586 analyses (Pante et al., 2015), forms clusters based on genetic similarity of each multilocus  
587 genotype, without considering a model of evolution. We first used the function *find.clusters* to  
588 find the best number of  $K$  genetic clusters in unlinked SNP datasets for each clade. *Find.clusters*  
589 was performed on  $K=20$  for each clade. The lowest value of the Bayesian Information Criterion  
590 (BIC) statistic was used to detect the optimal number of  $K$  clusters. These clusters were then  
591 analyzed using DAPC, which first transforms the data using principal components analysis and  
592 then performs a Discriminant Analysis on the retained principal components. The *optim.a.score*  
593 function was used to determine how many PC axes needed to be retained (Suppl. Fig. 6). Six  
594 PCAs and four discriminant functions were retained for clade 4; and six PCAs and six  
595 discriminant functions were retained for clade 5C (Suppl. Fig. 7). Scatterplots of discriminant  
596 functions were then created. We also used the function *assignplot* to visualize individual

597 membership in each  $K$  cluster, which can help show the accuracy of the cluster assignments and  
598 identify any individuals that have high probabilities of membership in  $>1$  cluster.

599         The Bayesian model-based clustering approach, Structure v2.3 (Pritchard et al., 2000),  
600 was also used to infer the number of *Sinularia* species. The program clusters individuals based  
601 on genetic variation alone, without any other prior information such as geographic origin or  
602 population assignment. Structure was performed on unlinked SNP datasets for both *Sinularia*  
603 clades 4 and 5C, and run in parallel using StrAutoParallel v 1.0 (Chhatre & Emerson, 2017)  
604 using an admixture model with correlated allele frequencies. Burnin was set to 250,000 followed  
605 by 1,000,000 MCMC generations. The inferred number of populations ( $K$ ) was set from 1 to 8  
606 for clade 4 and 1 to 10 for clade 5C; 20 runs of each  $K$  were conducted. We plotted the  
607 population structure assignments of  $K=4$  for clade 4 and  $K=8$  for clade 5C, because these were  
608 the number of genetic clusters suggested by DAPC analyses. Multiple runs of  $K$  were aligned  
609 with CLUMPP v 1.2 (Jakobsson & Rosenberg, 2007), and the resulting *indivq* file was input into  
610 Distruct v. 1.1 (Rosenberg, 2004) for graphical display of individual population assignments.  
611 The commonly used  $\Delta K$  method (Evanno et al., 2005) was not used in our study to identify an  
612 optimal  $K$  value because this method is known to be most successful at finding only the  
613 uppermost levels of genetic structure in a hierarchical system (Evanno et al., 2005). In addition,  
614 initial tests of the  $\Delta K$  method revealed  $K=2$  as the best model for each clade; however, analysis  
615 at  $K > 2$  indicated strong genetic structure in both clades 4 and 5C. Therefore, following Gowen  
616 et al., (2014), we analyzed successively smaller groups of species in separate analyses. We re-ran  
617 structure on the putative species, *S. tumulosa* and *S. slieringsi*, because Bayes Factor  
618 Delimitation with genome data (BFD\*) analyses (see below), suggested the presence of  
619 additional species within each of *S. tumulosa* and *S. slieringsi*.

620 Coalescent-based SNAPP v 1.3 (Bryant et al., 2012) analyses were used to test alternative  
621 species models for both clades 4 and 5C. Samples were assigned to the following alternative  
622 species models (Suppl. Figs. 8-9): 1) one species (ONESP), 2) two species (TWO SPP), 3) DAPC  
623 clusters (DAPC), 4) DAPC clusters plus division of another clade (DAPC+1), 5) MOTHRUR  
624 species assignments based on *mtMutS* (MUTS), and 6) MOTHRUR species assignments based on  
625 28S rDNA (28S). In addition, three (THREESPP) and four (FOURSPP) species models were  
626 also tested for clades 4 and 5C, respectively. SNAPP analyses were performed in BEAST v 2.4.5  
627 (Bouckaert et al., 2014) with a path sampling of 48 steps (MCMC length=100,000, pre-burnin=  
628 1,000) following Leaché et al. (2014) and Herrera & Shank (2016). The *c*0.85, *m*1.0, *p*0.25 bi-  
629 allelic SNP datasets (175 SNPs for clade 4, 140 SNPs for clade 5C, no missing data) were used  
630 because of the long computational time it took for each SNAPP run. Marginal likelihood  
631 estimates were obtained for each different model run in SNAPP analyses. The different species  
632 delimitation models were then ranked using BFD\* methods. Bayes Factors were calculated  
633 between each of two alternative models by subtracting the marginal likelihood estimates between  
634 two models, and then multiplying the difference by two (following Kass & Raftery, 1995;  
635 Leaché et al., 2014).

636 SNAPP was also used to infer the species tree for each *Sinularia* clade. Three  
637 independent runs were performed on SNP data (MCMC length=1,000,000, pre-burnin=1,000,  
638 samplefreq=1,000) using BEAST with default parameters for mutation rate, coalescent rate, and  
639 ancestral population sizes (following Herrera & Shank, 2016). The *c*0.85, *m*0.75, *p*0.25 bi-allelic  
640 SNP datasets were used for species tree analyses. Acceptance probabilities were checked to  
641 ensure that tuning parameters were appropriate and the chain mixed well (Drummond &  
642 Bouckaert, 2015). Log files were combined using LogCombiner v 1.1 and input into Tracer v1.6

643 (Rambaut & Drummond, 2007). Convergence and ESS>200 were assessed using Tracer after a  
644 10% burnin. Maximum clade credibility trees were generated with TreeAnnotator v 2.3  
645 (Bouckaert et al., 2014). Both the consensus tree and all tree topologies were drawn in  
646 DensiTree v2.2 (Bouckart, 2010).

647

#### 648 *Hybridization Tests*

649 We calculated Patterson's D statistics in ipyRAD v 0.7.28 (Eaton & Overcast, 2016) to  
650 test for hybridization between species. Briefly, these tests calculate the proportion of ABBA and  
651 BABA site patterns, and excess of either is indicative of admixture rather than incomplete  
652 lineage sorting (Durand et al., 2011; Green et al., 2010). Multiple 4-taxon tests were generated  
653 for both clades 4 and 5C (Suppl. File 1). For both clades, *S. humilis* was set as the outgroup  
654 ('p4'). For tests that included multiple individuals per lineage, SNP frequencies were pooled.  
655 For tests performed on clade 4, each species was set as 'p3' and all possible 4-species  
656 combinations were tested. For clade 5C, all possible 4-species combinations were tested in each  
657 of two sub-clades (i.e., the *S. slieringsi-S.penghuensis-S. acuta* clade and the *S. wanannensis-*  
658 *S.exilis-S. lochmodes-S. densa-S. maxima* clade). Additional tests were conducted either when  
659 Structure results indicated potential admixture or there was incongruence between the different  
660 molecular markers (i.e., 28S, *mtMutS*, RAD). When test results were significant at the species  
661 level, further tests were performed to determine if particular individuals within the lineage were  
662 admixed. Significance of each test was determined by performing 1000 bootstrap replicates in  
663 which loci were resampled with replacement. Both D statistics and Z statistics, which represent  
664 the number of bootstrap standard deviations ( $\alpha=3.0$ ) that D statistics deviate from zero  
665 (Federman et al., 2018), are reported. Following D-statistic tests, partitioned D-statistic tests

666 were performed for a few cases to examine the direction of introgression. Tests were conducted  
667 and figures were plotted following the ipyRAD ABBA-BABA cookbook in Jupyter Notebook  
668 (Kluyver et al., 2016; see Suppl. File 6).

669

#### 670 **Abbreviations**

671 RADSeq: Restriction Site-Associated Sequencing

672

#### 673 **Declarations**

#### 674 **Ethics Approval**

675 Not Applicable

#### 676 **Consent for Publication**

677 Not Applicable

#### 678 **Data Availability**

679 Raw RADSeq data: SRA#####

680 Mafft alignments: Data Dryad###

681 .Tre files: Data Dryad #####

682 28S sequences: Genbank #s MK333539–MK333628

683 mtMutS: GenBank #s: See Suppl. File 1

#### 684 **Competing Interests**

685 The authors declare that they have no competing interests.

686

#### 687 **Funding**

688 This study was made possible by a grant to YB from the Taiwanese Ministry of Science (MOST)

689 to conduct octocoral surveys at Dongsha Atoll. Additional funding was provided by Dongsha

690 Atoll Research Station and Howard Hughes Medical Institute Undergraduate Science Education  
691 Program award #52006301 to Harvey Mudd College.

## 692 **Author Contributions**

693 CSM, TW and YB conceived and designed the study. AMQ and CSM conducted all  
694 phylogenetic and species delimitation analyses, and co-wrote the manuscript. TW prepared  
695 samples, barcoded genes and conducted preliminary RADSeq analyses. YB made morphological  
696 identifications. CSM and YB collected specimens, facilitated by KS and MSJ. All authors edited  
697 and approved the final version of this manuscript.

## 698 **Acknowledgements**

699 All collections were made in accordance with permits obtained from Marine National Parks,  
700 Taiwan. We thank the staff members of Dongsha Atoll National Park, Dongsha Atoll Research  
701 Station (DARS), and Biodiversity Research Center, Academia Sinica (BRCAS) for assistance  
702 during the field work; A. Gonzalez, J.M. Adams, A. Torres-Navarro, and N. Liu for help with  
703 DNA extraction and barcoding; Ben Titus for helpful discussions; and Alex Shlagman for  
704 curatorial skills.

705

## 706 **References**

707 Aratake S, Tomura T, Saitoh S, Yokokura R, Kawanishi Y., Shinjo R, Reimer JD, Tanaka J,  
708 Maekawa H. Soft coral *Sarcophyton* (Cnidaria: Anthozoa: Octocorallia) species diversity and  
709 chemotypes. PLoS One. 2012;7:e30410.

710 Babcock RC, Bull GD, Harrison PD, Heyward AJ, Oliver JK, Wallace CC, Willis BL.  
711 Synchronous spawnings of 105 scleractinian coral species on the Great Barrier Reef. Mar Bio.  
712 1986;90:379-394.

- 713 Baco AR, Cairns SD. Comparing molecular variation to morphological species designations in  
714 the deep-sea coral *Narella* reveals new insights into seamount coral ranges. PLoS One. 2012;7:  
715 e45555.
- 716 Benayahu Y, Loya Y. Space partitioning by stony corals, soft corals and benthic algae on the  
717 coral reefs of the northern Gulf of Eilat (Red Sea). Helgolander wissenschaftliche  
718 Meeresuntersuchungen. 1977;30:362-382.
- 719 Benayahu Y. Species composition of soft corals (Octocorallia, Alcyonacea) on the coral reefs of  
720 Sesoko Island, Ryukyu Archipelago, Japan. Galaxea. 1995;12:103-124.
- 721 Benayahu Y, Ofwegen LP van. New species of octocorals (Coelenterata: Anthozoa) from the  
722 Penghu Archipelago, Taiwan. Zool. Studies, 2011;50:350-362.
- 723 Benayahu Y, Ofwegen LP van, Soong K, Dai CF, Jeng MS, Shlagman A, Hsieh HJ, McFadden  
724 CS. Diversity and distribution of Octocorals (Coelenterata: Anthozoa) on the coral reefs of  
725 Penghu, Taiwan. Zool. Studies. 2012;51:1529-1548.
- 726 Benayahu Y, Ofwegen LP van, Dai CF, Jeng MS, Soong K, Shlagman A, ...McFadden CS. The  
727 octocorals of Dongsha Atoll (South China Sea): an iterative approach to species identification  
728 using classical taxonomy and molecular barcodes. Zool. Studies.  
729 2018;57:doi:10.6620/ZS.2018.57-50.
- 730 Blunt JW, Carroll AR, Copp BR, Davis RA, Keyzers RA, Prinseps MR. Marine natural products.  
731 Natural Products Reports. 2018;35:8-53
- 732 Bouckaert RR. DensiTree: making sense of sets of phylogenetic trees. Bioinformatics.  
733 2010;26:1372-1373
- 734 Bouckaert R, Heled J, Kühnert D, Vaughan T, Wu CH, Xie D, Drummond AJ. BEAST 2: a  
735 software platform for Bayesian evolutionary analysis. PLoS Comp. Biol. 2014;10:4:e1003537



- 736 Bruno JF, Siddon CE, Witman JD, Colin PL, Toscano MA. El Niño related coral bleaching in  
737 Palau Western Caroline Islands. *Coral Reefs*. 2001;20:127-136
- 738 Bryant D, Bouckaert R, Felsenstein J, Rosenberg NA, RoyChoudhury A. Inferring species trees  
739 directly from biallelic genetic markers: bypassing gene trees in a full coalescent analysis. *Mol.*  
740 *Biol. Evol.* 2012;29:1917-1932
- 741 Carlo JM, Barbeitos MS, Lasker HR. Quantifying complex shapes: elliptical Fourier analysis of  
742 octocoral sclerites. *Biol. Bull.* 2011;220:224-237
- 743 Catchen J, Hohenlohe PA, Bassham S, Amores A, Cresko WA. Stacks: an analysis tool set for  
744 population genomics. *Mol. Ecol.* 2013;22:3124-3140
- 745 Chhatre VE, Emerson KJ. StrAuto: automation and parallelization of STRUCTURE analysis.  
746 *BMC Bioinformatics*. 2017;18:192
- 747 Combosch DJ, Vollmer SV. Trans-Pacific RAD-Seq population genomics confirms introgressive  
748 hybridization in Eastern Pacific *Pocillopora* corals. *Mol. Phy. Evol.* 2015;88:154-162
- 749 Currat M, Ruedi M, Petit RJ, Excoffier L. The hidden side of invasions: Massive introgression  
750 by local genes. *Evolution*. 2008;62:1908–1920
- 751 Darriba D, Taboada GL, Doallo R, Posada D. jModelTest 2: more models new heuristics and  
752 parallel computing. *Nature Methods*. 2012;9:772
- 753 Diekmann O, Bak R, Stam W, Olsen J. Molecular genetic evidence for probable reticulate  
754 speciation in the coral genus *Madracis* from a Caribbean fringing reef slope. *Mar. Biol.*  
755 2001;139:221-233
- 756 Dinesen ZD. Patterns in the distribution of soft corals across the Great Barrier Reef. *Coral Reefs*.  
757 1983;1:229-236

- 758 Drummond AJ, Bouckaert RR. Bayesian evolutionary analysis with BEAST. Cambridge  
759 University Press
- 760 Durand EY, Patterson N, Reich D, Slatkin M. Testing for ancient admixture between closely  
761 related populations. *Mol. Biol. Evol.* 2011;28:2239-2252
- 762 Eaton DA. PyRAD: assembly of de novo RADseq loci for phylogenetic analyses.  
763 *Bioinformatics.* 2014;30:1844-1849
- 764 Eaton DA, Ree RH. Inferring phylogeny and introgression using RADseq data: an example from  
765 flowering plants (*Pedicularis*: Orobanchaceae). *Syst. Biol.* 2013;62:689-706
- 766 Eaton DA, Hipp AL, González-Rodríguez A, Cavender-Bares J. Historical introgression among  
767 the American live oaks and the comparative nature of tests for introgression. *Evolution.*  
768 2015;69:2587-2601
- 769 Eaton DAR, Overcast I. ipyRAD: interactive assembly and analysis of RADseq data sets. 2016
- 770 Eaton DA. Ipyrad Cookbook. 2018.  
771 <http://nbviewer.jupyter.org/github/dereneaton/ipyrad/blob/master/tests/cookbook-abba->  
772 [babaipynb](http://nbviewer.jupyter.org/github/dereneaton/ipyrad/blob/master/tests/cookbook-abba-babaipynb). accessed 20 December 2018
- 773 Edwards SV, Liu L, Pearl DK. High-resolution species trees without concatenation. *PNAS.*  
774 2007;104:5936-5941
- 775 Evanno G, Regnaut S, Goudet J. Detecting the number of clusters of individuals using the  
776 software STRUCTURE: a simulation study. *Mol. Ecol.* 2005;14:2611-2620
- 777 Fabricius KE. Reef invasion by soft corals: which taxa and which habitats? In: Greenwood JG,  
778 Hall NJ, editors. *Proceedings of the Australian Coral Reef Society 75th Anniversary*  
779 *Conference Heron Island October 1997. University of Queensland Brisbane; 1998. P. 77-90*

- 780 Fabricius K. Tissue loss and mortality of soft corals following mass-bleaching. *Coral Reefs*.  
781 1999;18:54
- 782 Fabricius K, Alderslade P. Soft corals and sea fans: a comprehensive guide to the tropical  
783 shallow-water genera of the Central West-Pacific the Indian Ocean and the Red Sea.  
784 Townsville: Australian Institute of Marine Science; 2001
- 785 Federman S, Donoghue MJ, Daly DC, Eaton DA. Reconciling species diversity in a tropical  
786 plant clade *Canarium* Burseraceae. *PLoS One*. 2018;13:6:e0198882
- 787 Felsenstein J. PHYLIP phylogeny inference package Distributed by the author. Department of  
788 Genome Sciences University of Washington Seattle Version 3; 2005
- 789 Forsman ZH, Barshis DJ, Hunter CL, Toonen RJ. Shape-shifting corals: molecular markers show  
790 morphology is evolutionarily plastic in *Porites*. *BMC Evol. Biol.* 2009;9:45
- 791 Forsman ZH, Concepcion GT, Haverkort RD, Shaw RW, Maragos JE, Toonen RJ. Ecomorph or  
792 endangered coral? DNA and microstructure reveal Hawaiian species complexes: *Montipora*  
793 *dilatata/flabellata/turgescens* *M. patula/verrilli*. *PLoS One*. 2010;5:e15021
- 794 Forsman ZH, Knapp ISS, Tisthammer K, Eaton DAR, Belcaid M, Toonen RJ. Coral  
795 hybridization or phenotypic variation? Genomic data reveal gene flow between *Porites lobata*  
796 and *P. compressa*. *Mol. Phyl. Evol.* 2017;111:132-148
- 797 Frade PR, Reyes-Nivia MC, Faria J, Kaandorp JA, Luttikhuisen PC, Bak RPM. Semi-permeable  
798 species boundaries in the coral genus *Madracis*: introgression in a brooding coral system.  
799 *Mol. Phyl. Evol.* 2010;57:1072-1090
- 800 Fukami H, Budd AF, Levitan DR, Jara J, Kersanach R, Knowlton N. Geographic differences in  
801 species boundaries among members of the *Montastraea annularis* complex based on  
802 molecular and morphological markers. *Evolution*. 2004;58:324-337

- 803 Goulet TL, LaJeunesse TC, Fabricius KE. Symbiont specificity and beaching susceptibility  
804 among soft corals in the 1998 Great Barrier Reef mass coral bleaching event. *Mar. Biol.*  
805 2006;154:795-804
- 806 Gowen FC, Maley JM, Cicero C, Peterson AT, Faircloth BC, Warr TC, McCormack JE.  
807 Speciation in Western Scrub-Jays Haldane's rule and genetic clines in secondary contact.  
808 *BMC Evol. Biol.* 2014;14:135
- 809 Green RE, Krause J, Briggs AW, Maricic T, Stenzel U, Kircher M, Hansen NF. A draft  
810 sequence of the *Neandertal* genome. *Science* 2010;328:710-722
- 811 Harrison PL, Babcock RC, Bull GD, Oliver JK, Wallace CC, Willis BL. Mass spawning in  
812 tropical reef corals. *Science* 1984;223:1186-1189
- 813 Hatta M, Fukami H, Wang W, Omori M, Shimoike K, Hayashibara T, Sugiyama T.  
814 Reproductive and genetic evidence for a reticulate evolutionary history of mass-spawning  
815 corals. *Mol. Biol. Evol.* 1999;16:1607-1613
- 816 Hebert PD, Penton EH, Burns JM, Janzen DH, Hallwachs W. Ten species in one: DNA  
817 barcoding reveals cryptic species in the neotropical skipper butterfly *Astraptes fulgerator*.  
818 *PNAS*. 2004a;101:14812-14817
- 819 Hebert PD, Stoeckle MY, Zemplak TS, Francis CM. Identification of birds through DNA  
820 barcodes. *PLoS Biology*. 2004b;2:e312
- 821 Herrera S, Shank TM. RAD sequencing enables unprecedented phylogenetic resolution and  
822 objective species delimitation in recalcitrant divergent taxa. *Mol. Phyl. Evol.* 2016;100:70-79
- 823 Hickerson MJ, Meyer CP, Moritz C. DNA barcoding will often fail to discover new animal  
824 species over broad parameter space. *Syst. Biol.* 2006;55:729-739

- 825 Huang D, Meier R, Todd PA, Chou LM. Slow mitochondrial COI sequence evolution at the base  
826 of the metazoan tree and its implications for DNA barcoding. *J. Mol. Evol.* 2008;66:167-174
- 827 Jakobsson M, Rosenberg NA. CLUMPP: a cluster matching and permutation program for  
828 dealing with label switching and multimodality in analysis of population structure.  
829 *Bioinformatics.* 2007;23:1801-1806
- 830 Jeng M-S, Huang H-D, Dai C-F, Hsiao Y-C, Benayahu Y. Sclerite calcification and reef-  
831 building in the fleshy octocoral genus *Sinularia* (Octocorallia: Alcyonacea). *Coral Reefs.*  
832 2011;30:925-933
- 833 Johnston EC, Forsman ZH, Flot JF, Schmidt-Roach S, Pinzón JH, Knapp IS, Toonen RJ. A  
834 genomic glance through the fog of plasticity and diversification in *Pocillopora*. *Scientific*  
835 *Reports.* 2017;7:5991
- 836 Jombart T, Collins C. A tutorial for discriminant analysis of principal components DAPC using  
837 adegenet. Imperial College of London MRC Center for Outbreak Analysis and Modelling;  
838 2015
- 839 Kahng SE, Benayahu Y, Lasker HR. Sexual reproduction in octocorals. *Mar. Ecol. Prog. Ser.*  
840 2011;443:265-283
- 841 Katoh K, Toh H. Recent developments in the MAFFT multiple sequence alignment program.  
842 *Briefings in Bioinformatics* 2008;9:286-298
- 843 Kass RE, Raftery AE. Bayes factors. *J. Am. Stat. Assoc.* 90. 1995;90:773-795
- 844 Keshavmurthy S, Yang S-Y, Alamaru A, Chuang Y-Y, Pichon M, Obura D, Chen AC. DNA  
845 barcoding reveals the coral "laboratory rat" *Stylophora pistillata* encompasses multiple  
846 identities. *Scientific Reports.* 2013;3:1520

- 847 Kim E, Lasker HR, Coffroth MA, Kim K. Morphological and genetic variation across reef  
848 habitats in a broadcast-spawning octocoral. *Hydrobiologia* 2004;530:423-432
- 849 Kluyver T, Ragan-Kelley B, Pérez F, Granger BE, Bussonnier M, Frederic J, Ivanov P. May  
850 Jupyter Notebooks-a publishing format for reproducible computational workflows.  
851 In: ELPUB; 2016. p. 87-90
- 852 Kubatko LS, Degnan JH. Inconsistency of phylogenetic estimates from concatenated data under  
853 coalescence. *Syst. Biol.* 2007;56:17-24
- 854 Kubatko LS. Identifying hybridization events in the presence of coalescence via model selection.  
855 *Syst. Biol.* 2009; 58:478-488
- 856 LaJeunesse TC, Parkinson JE, Gabrielson PW, Jeong HJ, Reimer JD, Voolstra CR, Santos SR.  
857 Systematic revision of Symbiodiniaceae highlights the antiquity and diversity of coral  
858 endosymbionts. *Current Biol.* 2018;28:2570-2580
- 859 Leaché AD, Fujita MK, Minin VN, Bouckaert RR. Species delimitation using genome-wide SNP  
860 data. *Syst. Biol.* 2014;63:534-542
- 861 Lin S, Cheng S, Song B, Zhong X, Lin X, Li W, Cai M. The *Symbiodinium kawagutii* genome  
862 illuminates dinoflagellate gene expression and coral symbiosis. *Science.* 2015;350:691-694
- 863 Maddison WP. Gene trees in species trees. *Systematic biology* 1997;46:523-536
- 864 Manuputty AEW, Ofwegen LP van. The genus *Sinularia* (Octocorallia: Alcyonacea) from  
865 Ambon and Seram Moluccas Indonesia *Zoologische Mededelingen Leiden* .2007;81:187-216
- 866 Marshall PA, Baird AH. Bleaching of corals on the Great Barrier Reef: differential  
867 susceptibilities among taxa. *Coral Reefs.* 2000;19:155-163
- 868 McFadden CS, Hutchinson MB. Molecular evidence for the hybrid origin of species in the soft  
869 coral genus *Alcyonium* (Cnidaria: Anthozoa: Octocorallia). *Mol. Ecol.* 2004;13:1495-1505

- 870 McFadden CS, Ofwegen LP van, Beckman EJ, Benayahu Y, Alderslade P. Molecular  
871 systematics of the speciose Indo-Pacific soft coral genus *Sinularia* (Anthozoa: Octocorallia).  
872 Invert. Biol. 2009;128:303-323
- 873 McFadden CS, Benayahu Y, Pante E, Thoma JN, Nevarez PA, France SC. Limitations of  
874 mitochondrial gene barcoding in Octocorallia. Mol. Ecol. Res. 2011;11: 19-31
- 875 McFadden CS, Brown AS, Brayton C, Hunt CB, Ofwegen LP van. Application of DNA  
876 barcoding to biodiversity studies of shallow-water octocorals: molecular proxies agree with  
877 morphological estimates of species richness in Palau. Coral Reefs. 2014;33:275-286
- 878 McFadden CS, Haverkort-Yeh R, Reynolds AM, Halász A, Quattrini AM, Forsman ZH, Toonen  
879 RJ. Species boundaries in the absence of morphological ecological or geographical  
880 differentiation in the Red Sea octocoral genus *Ovabunda* (Alcyonacea: Xeniidae). Mol. Phyl.  
881 Evol. 2017;112:174-184
- 882 Miller DJ, Van Oppen MJ. A 'fair go' for coral hybridization. Mol. Ecol. 2003;12:805-807
- 883 Ofwegen LP van. Status of knowledge of the Indo-Pacific soft coral genus *Sinularia* May 1898  
884 (Anthozoa: Octocorallia) Proceedings of the 9th International Coral Reef Symposium.  
885 2002;1:167-171
- 886 Ofwegen LP van. The genus *Sinularia* (Octocorallia: Alcyonacea) at Palau Micronesia.  
887 Zoologische Mededelingen Leiden. 2008;82:631-735
- 888 Ofwegen LP van, Benayahu Y, McFadden CS. *Sinularia leptocladus* Ehrenberg 1834 Cnidaria:  
889 Octocorallia re-examined. ZooKeys. 2013;272:29-59
- 890 Ofwegen LP van, McFadden CS, Benayahu Y. *Sinularia polydactyla* Ehrenberg 1834 (Cnidaria,  
891 Octocorallia) re-examined with description of a new species. ZooKeys. 2016;581:71-126

- 892 Pante E, Abdelkrim J, Viricel A, Gey D, France SC, Boisselier MC, Samadi S. Use of RAD  
893 sequencing for delimiting species. *Heredity* 2015;114:450
- 894 Paz-García DA, Hellberg ME, García-de-León FJ, Balart EF. Switch between morphospecies of  
895 *Pocillopora* corals. *Am. Nat.* 2015;186:434-440
- 896 Prada C, DeBiase MB, Neigel JE, Yednock B, Stake JL, Forsman ZH, Hellberg ME. Genetic  
897 species delineation among branching Caribbean *Porites* corals. *Coral Reefs*. 2014;33:1019-  
898 1030
- 899 Pritchard JK, Stephens M, Rosenberg NA, Donnelly P. Association mapping in structured  
900 populations. *The American Journal of Human Genetics*. 2000;67:170-181
- 901 Quattrini AM, Faircloth BC, Dueñas LF, Bridge TC, Brugler MR, Calixto-Botía IF, et al.  
902 McFadden CS. Universal target-enrichment baits for anthozoan (Cnidaria) phylogenomics:  
903 New approaches to long-standing problems. *Mol. Ecol. Res.* 2018;18:281-295
- 904 R Core Team. R: A Language and Environment for Statistical Computing. R Foundation for  
905 Statistical Computing Vienna Austria. 2012 <http://www.r-project.org/>, accessed 15 Jan 2019.
- 906 Radice VZ, Quattrini AM, Wareham VE, Edinger EN, Cordes EE. Vertical water mass structure  
907 in the North Atlantic influences the bathymetric distribution of species in the deep-sea coral  
908 genus *Paramuricea*. *Deep Sea Res. I.* 2016;116: 253-263
- 909 Rambaut A, Drummond AJ. Tracer v1.4 2007; 2012
- 910 Richards ZT, van Oppen MJH, Wallace CC, Willis BL, Miller DJ. Some rare Indo-Pacific coral  
911 species are probable hybrids. *PLoS One*. 2008;3:e3240
- 912 Richmond RH, Hunter CL. Reproduction and recruitment of corals: comparisons among the  
913 Caribbean the Tropical Pacific and the Red Sea. *Mar. Ecol. Prog. Ser.* 1990;60:185-203



- 914 Rheindt FE, Edwards SV. Genetic introgression: an integral but neglected component of  
915 speciation in birds. *The Auk*. 2011;128:620-632
- 916 Rogers AR, Bohlender RJ. Bias in estimators of archaic admixture. *Theoretical Pop. Biol.*  
917 2015;100:63-78
- 918 Rosenberg NA. DISTRUCT: a program for the graphical display of population structure. *Mol.*  
919 *Ecol. Notes*. 2004;4:137-138
- 920 Rowley SJ, Pochon X, Watling L. Environmental influences on the Indo–Pacific octocoral *Isis*  
921 *hippuris* Linnaeus 1758 Alcyonacea: Isididae: genetic fixation or phenotypic plasticity? *PeerJ*  
922 2015;3:e1128
- 923 Sánchez JA, Aguilar C, Dorado D, Manrique N. Phenotypic plasticity and morphological  
924 integration in a marine modular invertebrate. *BMC Evol. Biol.* 2007;7 :122
- 925 Schloss PD, Westcott SL, Ryabin T, Hall JR, Hartmann M, Hollister EB, Sahl JW. Introducing  
926 mothur: open-source platform-independent community-supported software for describing and  
927 comparing microbial communities. *Appl. Envir. Micro.* 2009;75:7537-7541
- 928 Schmieder R, Edwards R. Fast identification and removal of sequence contamination from  
929 genomic and metagenomic datasets. *PLoS One*. 2011;6: e17288
- 930 Shearer TL, Coffroth MA. Barcoding corals: limited by interspecific divergence not intraspecific  
931 variation. *Mol. Ecol. Res.* 2008;8:247-255
- 932 Shoham E, Benayahu Y. Higher species richness of octocorals in the upper mesophotic zone in  
933 Eilat Gulf of Aqaba compared to shallower reef zones. *Coral Reefs*. 2017;36:71-81
- 934 Shoham E, Prohaska T, Barkai Z, Zitek A, Benayahu Y. Soft corals form aragonite-precipitated  
935 columnar spiculite in mesophotic reefs. *Scientific Reports*. In press

- 936 Slattery M, Hines GA, Starmer J, Paul VJ. Chemical signals in gametogenesis spawning and  
937 larval settlement and defense of the soft coral *Sinularia polydactyla*. *Coral Reefs*. 1999;18:75-  
938 84
- 939 Slattery M, Starmer J, Paul VJ. Temporal and spatial variation in defensive metabolites of the  
940 tropical soft corals *Sinularia maxima* and *S. polydactyla*. *Mar. Biol.* 2001;138:1183-1193
- 941 Slattery M, Kamel HN, Ankisetty S, Gochfield DJ, Hoover CA, Thacker RW. Hybrid vigor in a  
942 tropical Pacific soft-coral community. *Ecol Monogr.* 2008;78:423-443
- 943 Stamatakis A. RAxML-VI-HPC: maximum likelihood-based phylogenetic analyses with  
944 thousands of taxa and mixed models. *Bioinformatics.* 2006;22:2688-2690
- 945 Sukumaran J, Knowles LL. Multispecies coalescent delimits structure not species. *PNAS.*  
946 2017;114:1607-1612
- 947 Titus BM, Daly M. Reduced representation sequencing for symbiotic anthozoans: are reference  
948 genomes necessary to eliminate endosymbiont contamination and make robust  
949 phylogeographic inference? *bioRxiv* 2018; doi: <https://doi.org/10.1101/440289>
- 950 Tursch B, Tursch A. The soft coral community on a sheltered reef quadrat at Laing Island Papua  
951 New Guinea. *Mar. Biol.* 1982;68:321-332
- 952 Van Alstyne KL, Wylie CR, Paul VJ. Antipredator defenses in tropical Pacific soft corals  
953 Coelenterata: Alcyonacea II. The relative importance of chemical and structural defenses in  
954 three species of *Sinularia*. *J. Mar. Biol. Ecol.* 1994;178:17-34
- 955 van Oppen MV, Willis BL, Vugt HV, Miller DJ. Examination of species boundaries in the  
956 *Acropora cervicornis* group (Scleractinia, Cnidaria) using nuclear DNA sequence analyses.  
957 *Mol Ecol.* 2000;9:1363-1373

- 958 van Oppen MJ, McDonald BJ, Willis B, Miller DJ. The evolutionary history of the coral genus  
959 *Acropora* (Scleractinia, Cnidaria) based on a mitochondrial and a nuclear marker: reticulation  
960 incomplete lineage sorting or morphological convergence? Mol. Biol. Evol. 2001;18:1315-  
961 1329
- 962 van Oppen MJ, Willis BL, Van Rheede T, Miller DJ. Spawning times reproductive  
963 compatibilities and genetic structuring in the *Acropora aspera* group: evidence for natural  
964 hybridization and semi-permeable species boundaries in corals. Mol. Ecol. 2002;11:1363-  
965 1376
- 966 Vargas S, Breedy O, Siles F, Guzman HM. How many kinds of sclerite? Towards a  
967 morphometric classification of gorgoniid microskeletal components. Micron. 2010;41:158-  
968 164
- 969 Verseveldt J. A revision of the genus *Sinularia* May Octocorallia Alcyonacea. Zoologische  
970 Verhandelingen. 1980;179:1-128
- 971 Vollmer SV, Palumbi SR. Hybridization and the evolution of reef coral diversity. Science.  
972 2002;296:2023-2025
- 973 Willis BL, Babcock RC, Harrison PL, Wallace CC. Experimental hybridization and breeding  
974 incompatibilities within the mating systems of mass spawning reef corals Coral Reefs.  
975 1997;16:S53-S65
- 976 Willis BL, van Oppen MJ, Miller DJ, Vollmer SV, Ayre DJ. The role of hybridization in the  
977 evolution of reef corals. Annu. Rev. Ecol. Evol. Syst. 2006;37:489-517
- 978 [WoRMS Editorial Board](#). World Register of Marine Species. 2018 <http://www.marinespecies.org>  
979 at VLIZ. Accessed 19 Dec 2018, doi:1014284/170

- 980 Wylie CR, Paul VJ. Chemical defenses in three species of *Sinularia* Coelenterata Alcyonacea:  
981 effects against generalist predators and the butterflyfish *Chaetodon unimaculatus* Bloch. J.  
982 Mar. Biol. Ecol. 1989;129: 141-160
- 983 Zwickl DJ. GARLI: genetic algorithm for rapid likelihood inference. 2006.  
984 <http://www.bio.utexas.edu/faculty/antisense/garli/Garli.html>, accessed 15 Jan 2019  
985  
986

987 **Figures**

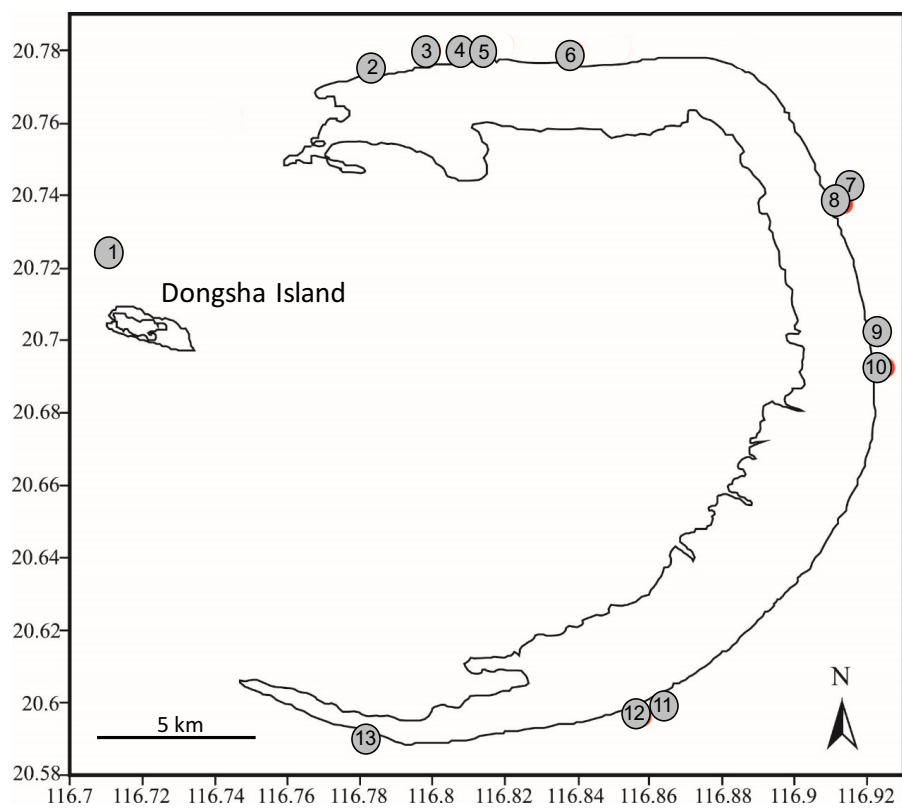

988

989 Figure 1. Map of Dongsha Atoll Marine National Park, Taiwan. Collection sites indicated by  
990 numbered circles. Adapted from Benayahu et al. (2018).

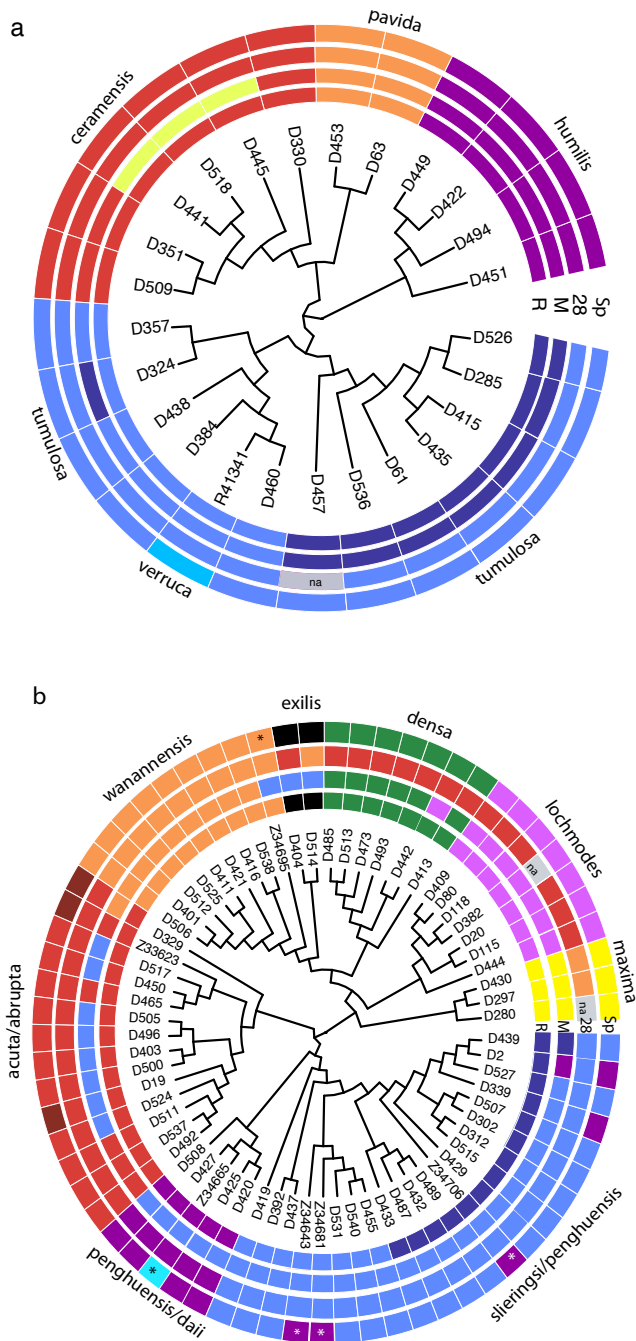

991

992

993 Figure 2. Maximum likelihood cladograms for Dongsha Atoll *Simularia* a) clade 4 and b) clade  
 994 5C. Each colored cell denotes an individual's species assignment based on RAD data (R), a  
 995 morphospecies assignment (Sp), or a molecular operational taxonomic unit (MOTUs) based on  
 996 *mtMutS* (M) and 28S rDNA (28). Colors match RAD clades in Figures 3 and 4. \*=holotype and  
 997 paratype. Morphospecies names are also included. See also Suppl. Table 1 for clade and MOTU  
 998 assignments. Gray cells ('na') denote missing data.

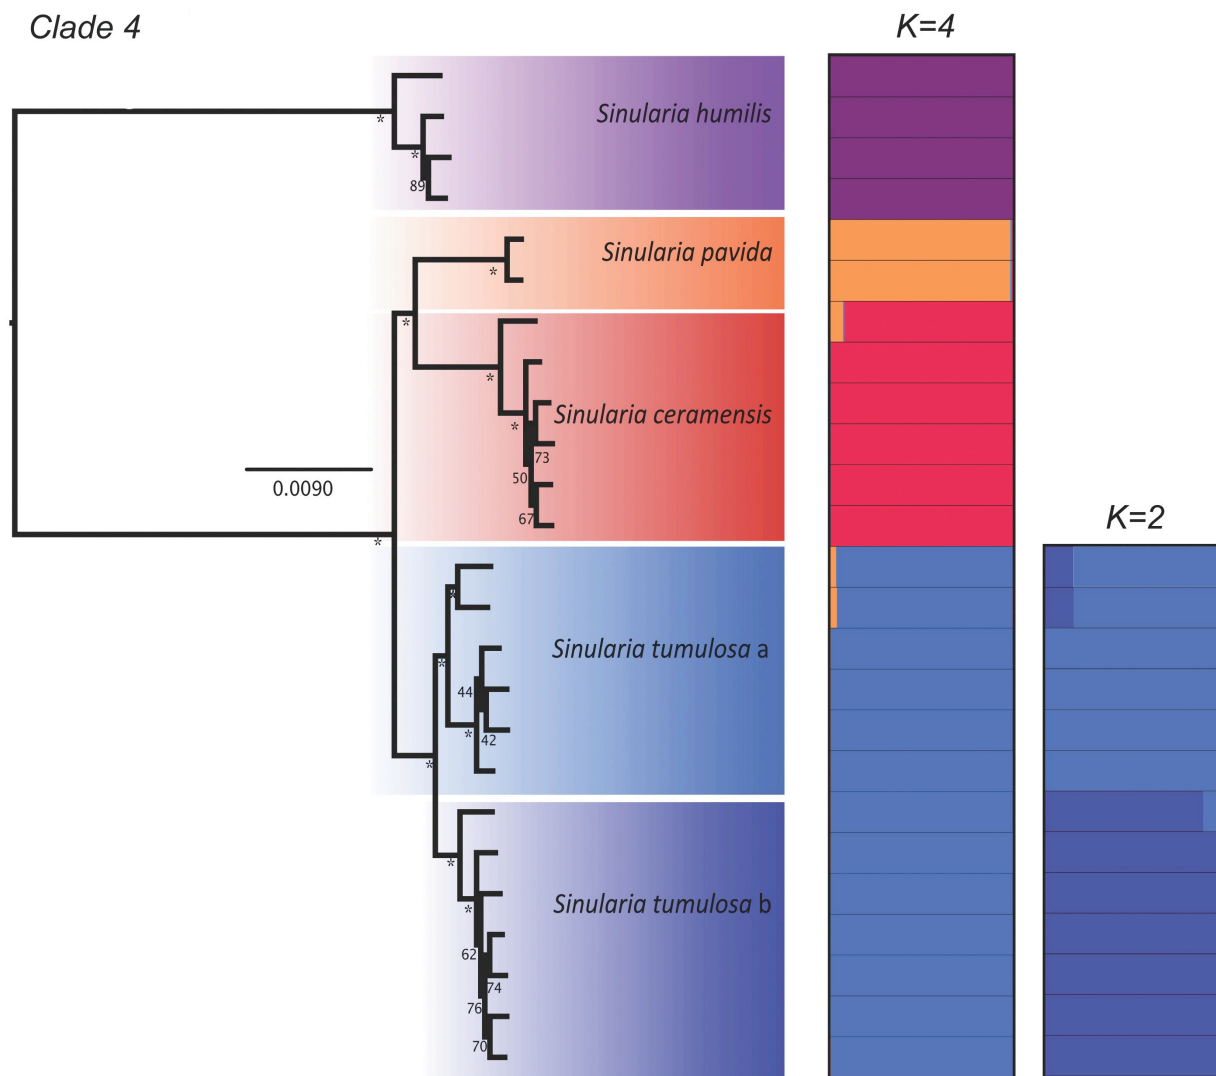

999

1000 Figure 3. Maximum likelihood phylogeny of Dongsha Atoll *Sinularia* clade 4 constructed using  
1001 RAxML rapid bootstrapping (200 b.s. replicates) on the concatenated c 0.85, m 0.75, p 0.25  
1002 locus dataset. \* denotes 100% b.s. support. DISTRUCT plots are included and show the probability  
1003 of individual membership into different  $K$  ( $K=4$  for clade4 and  $K=2$  for the *S. tumulosa* group)  
1004 clusters. Colors denote different species.  
1005

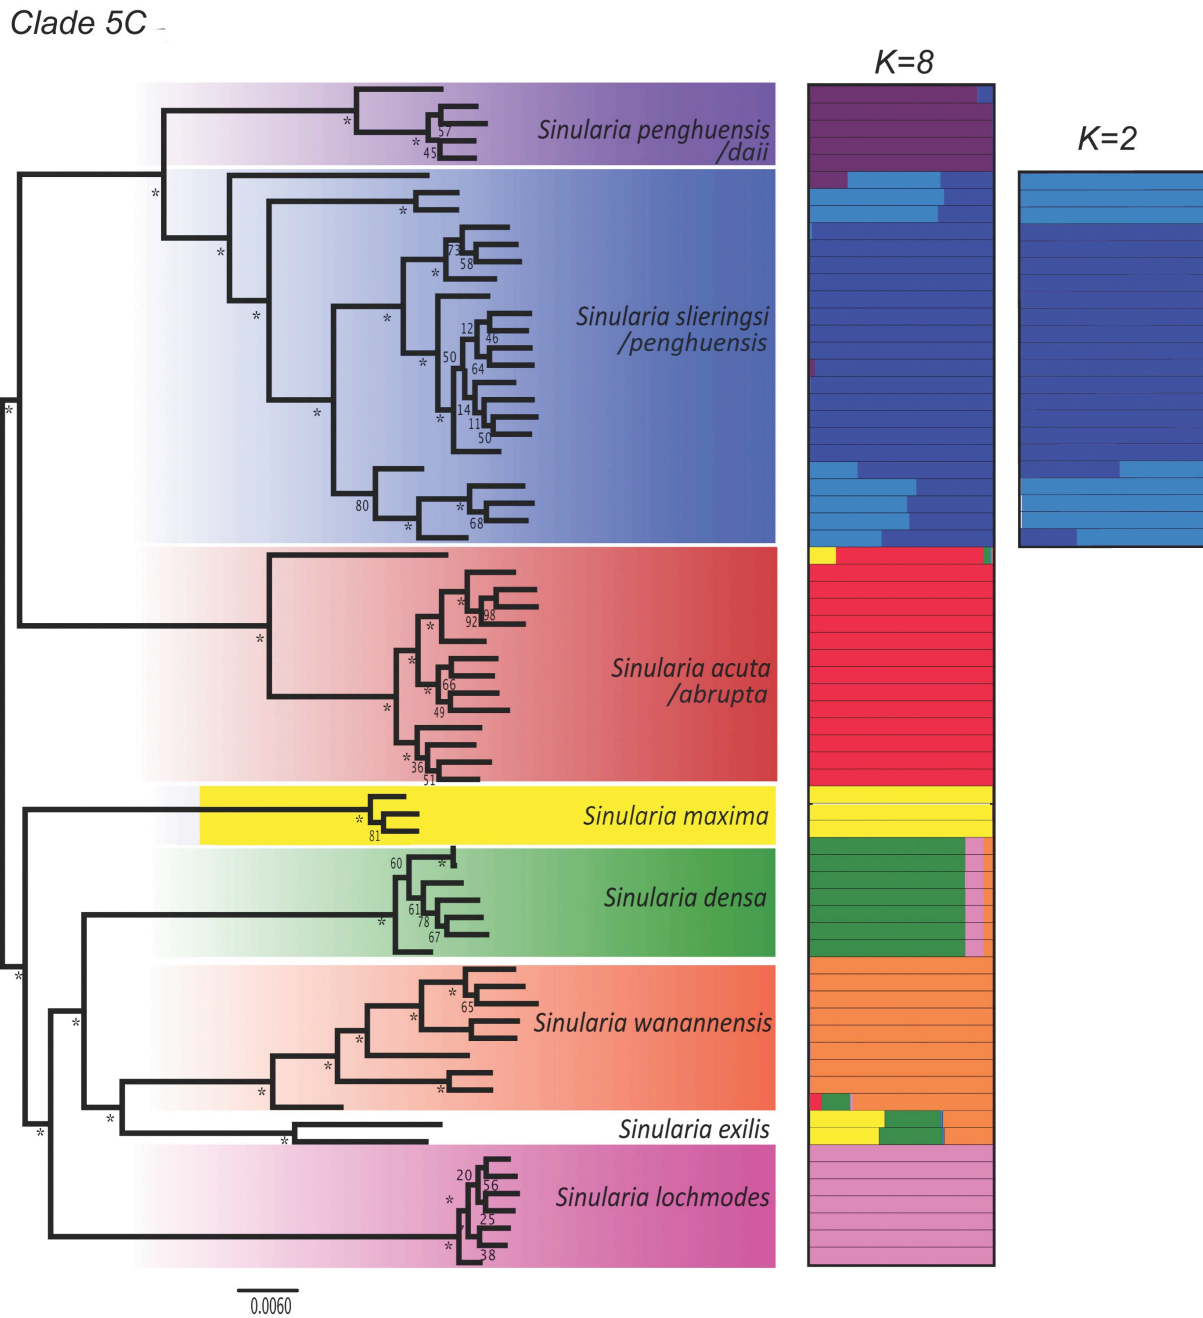

1006

1007 Figure 4. Maximum likelihood phylogeny of Dongsha Atoll *Sinularia* clade 5C constructed  
1008 using RAxML rapid bootstrapping (200 b.s. replicates) on the concatenated c 0.85, m 0.75, p  
1009 0.25 locus dataset. \* denotes 100% b.s. support. Distruct plots are included and show the  
1010 probability of membership into different  $K$  ( $K=8$  for clade 5C, and  $K=2$  for the *S. slieringsi* group)  
1011 clusters. Colors denote different species.



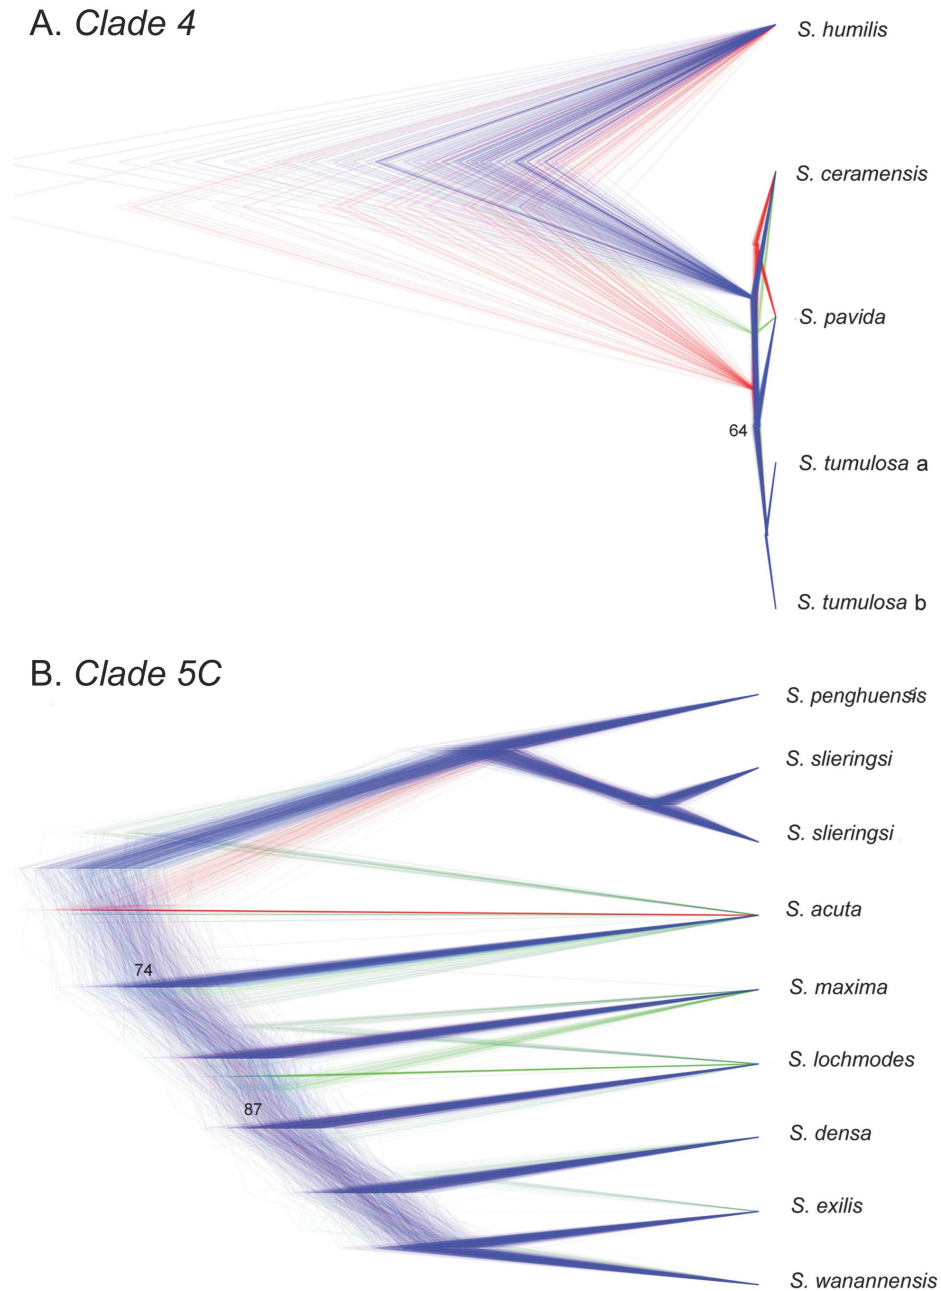

1012

1013

1014 Figure 5. Species trees of Dongsha Atoll *Sinularia* clades 4 and 5C. Cloudograms illustrate the  
1015 best species delimitation models (DAPC+1) for both clades inferred from bi-allelic SNP data [(A)  
1016 clade 4: 6,236 SNPs and (B) clade 5C: 8,022 SNPs); *m*0.75 datasets] using SNAPP species tree  
1017 analyses. The maximum clade credibility tree and congruent trees are in blue. Trees with  
1018 different topologies are in red and green. Posterior probabilities at internal nodes >95% unless  
1019 indicated.

1020

1021

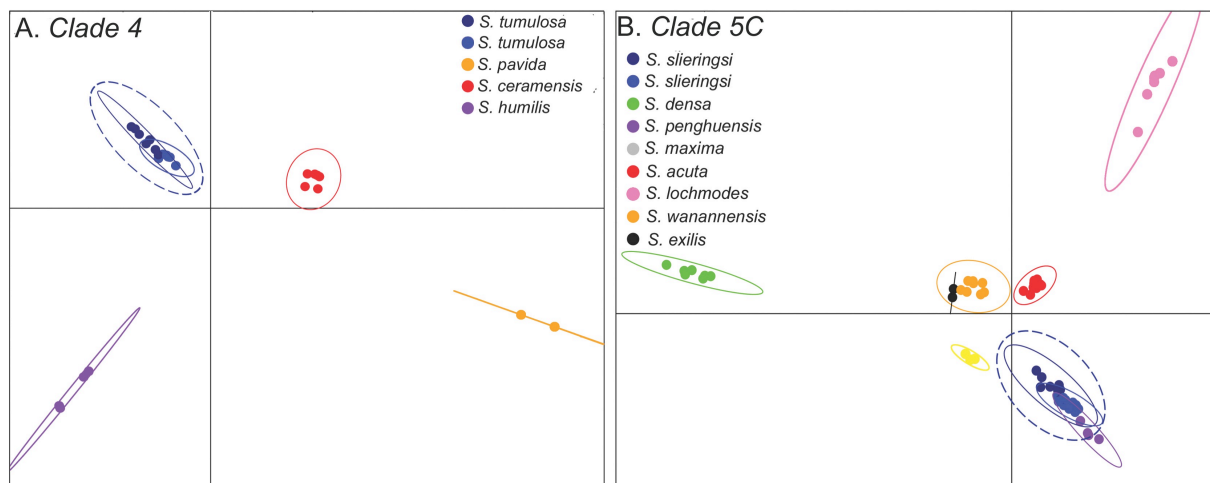

1022

1023 Figure 6. Discriminant analysis of principal components (DAPC) plots for Dongsha Atoll  
1024 *Simularia* (A) clade 4 and (B) clade 5C. Genetic clusters representing different morphospecies  
1025 are color coded to match the phylogenetic trees in Figures 2, 3 and 4. Species (*S. tumulosa* in (A)  
1026 and *S. slieringsi* in (B) encircled in dotted lines) that were suggested to be further divided into  
1027 two species by Bayes Factor Determination are also denoted.  
1028

### Clade 4

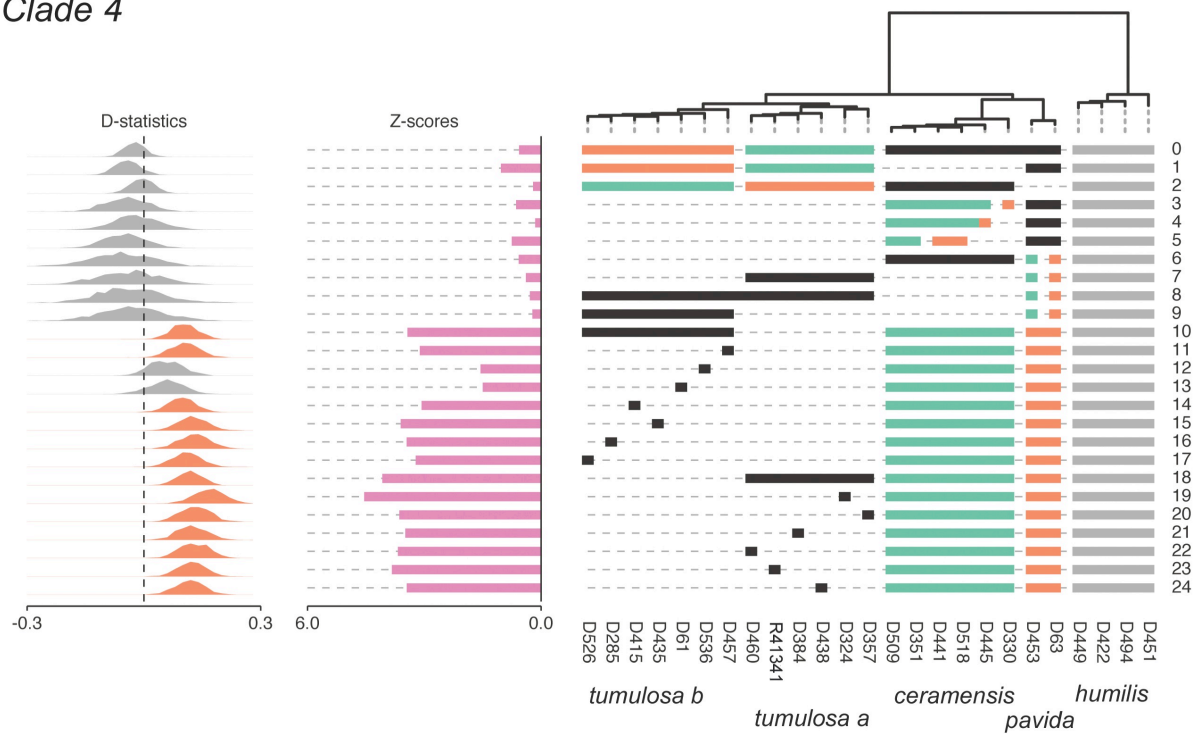

1029

1030

1031 Figure 7. D-statistic tests for admixture in Dongsha Atoll *Sinularia* clade 4. Test numbers are  
 1032 listed on the right for each 4-taxon test (((p1, p2), p3), p4). Horizontal bars below the tips of the  
 1033 tree indicate which taxa were included in each test. *S. humilis* was set as the outgroup for all tests  
 1034 (indicated by gray bars). Tests are configured to ask whether P3 (black bars) shares more derived  
 1035 SNPs with lineage P1 (green bars) relative to P2 (orange bars). As illustrated to the left, Z scores  
 1036 are bar plots and D-statistics are histograms. Histograms are green for significant gene flow  
 1037 between P1 and P3 (BABA) and orange for significant gene flow between P2 and P3 (ABBA).  
 1038 D-statistics that were not significant are gray. Significance was assessed at an alpha level of 3.0  
 1039 (i.e., when D deviates > 3.0 standard deviations from zero).

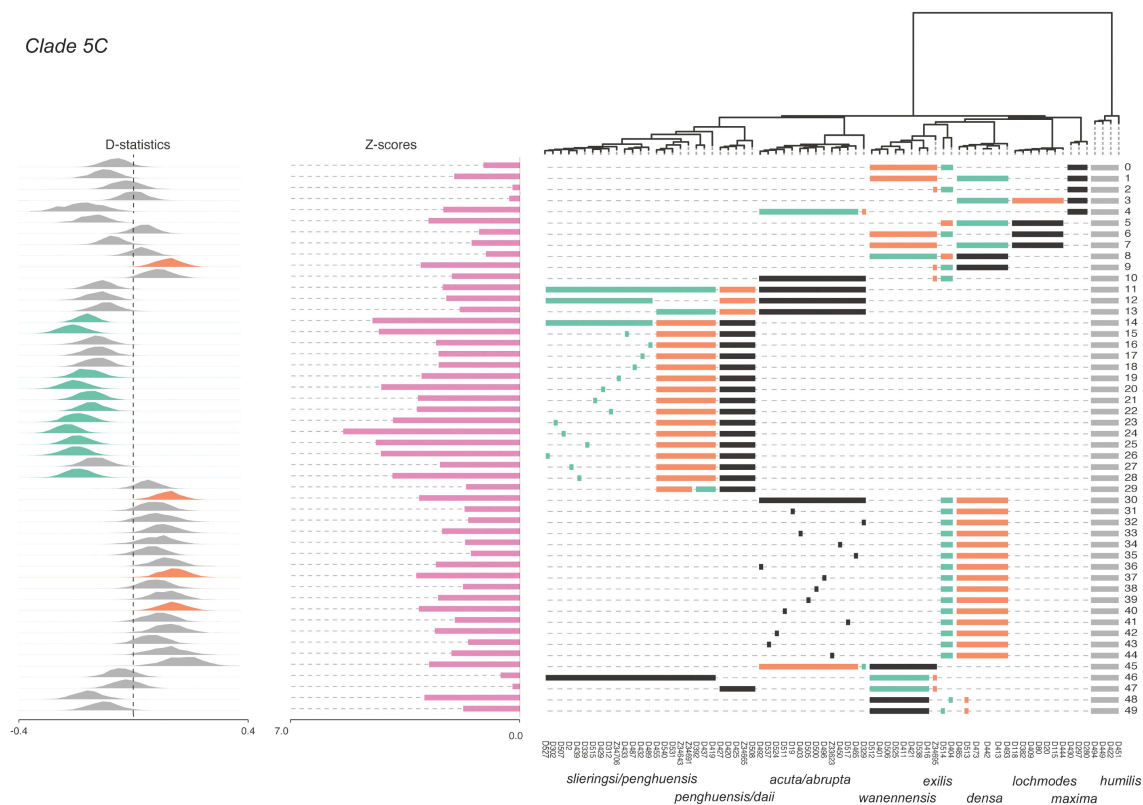

1040

1041 Figure 8. D-statistic tests for admixture in Dongsha Atoll *Sinularia* clade 5C. Test numbers are  
 1042 listed on the right for each 4-taxon test (((p1, p2), p3), p4). Horizontal bars below the tips of the  
 1043 tree indicate which taxa were included in each test. *S. humilis* was set as the outgroup for all tests  
 1044 (indicated by gray bars). Tests are configured to ask whether P3 (black bars) shares more derived  
 1045 SNPs with lineage P1 (green bars) relative to P2 (orange bars). As illustrated to the left, Z scores  
 1046 are bar plots and D-statistics are histograms. Histograms are green for significant gene flow  
 1047 between P1 and P3 (BABA) and orange for significant gene flow between P2 and P3 (ABBA).  
 1048 D-statistics that were not significant are gray. Significance was assessed at an alpha level of 3.0  
 1049 (i.e., when D deviates > 3.0 standard deviations from zero).

1050

1051

1052

1053

1054

1055 Table 1. Morphospecies of *Simularia* included in RADseq analysis. Clade corresponds to  
 1056 designations in McFadden et al., (2009). N: number of specimens sequenced. #Sites: number of  
 1057 different dive sites at Dongsha Atoll at which a species was collected.

| <b>Species</b>        | <b>Authority</b>          | <b>Clade</b> | <b>N</b> | <b>#Sites</b> | <b>Depth (m)</b> |
|-----------------------|---------------------------|--------------|----------|---------------|------------------|
| <i>S. abrupta</i>     | Tixier-Durivault, 1970    | 5C           | 3        | 2             | 8–13             |
| <i>S. acuta</i>       | Manuputty & Ofwegen, 2007 | 5C           | 11       | 6             | 4–14             |
| <i>S. ceramensis</i>  | Verseveldt, 1977          | 4D           | 6        | 5             | 3–13             |
| <i>S. daii*</i>       | Benayahu & Ofwegen, 2011  | 5C           | 1        | -             | ---              |
| <i>S. densa</i>       | (Whitelegge, 1897)        | 5C           | 6        | 4             | 3–14             |
| <i>S. exilis</i>      | Tixier-Durivault, 1970    | 5C           | 2        | 2             | 5–14             |
| <i>S. humilis</i>     | Ofwegen, 2008             | 4B           | 4        | 3             | 3–21             |
| <i>S. lochmodes</i>   | Kolonko, 1926             | 5C           | 8        | 6             | 4–14             |
| <i>S. maxima</i>      | Verseveldt, 1971          | 5C           | 3        | 2             | 3–17             |
| <i>S. pavida</i>      | Tixier-Durivault, 1970    | 4D           | 2        | 2             | 4–5              |
| <i>S. penghuensis</i> | Ofwegen & Benayahu, 2012  | 5C           | 8        | 3             | 3–21             |
| <i>S. slieringsi</i>  | Ofwegen & Vennam, 1994    | 5C           | 17       | 6             | 3–21             |
| <i>S. tumulosa</i>    | Ofwegen, 2008             | 4D           | 12       | 8             | 3–17             |
| <i>S. verruca*</i>    | Ofwegen, 2008             | 4D           | 1        | -             | ---              |
| <i>S. wanannensis</i> | Ofwegen & Benayahu, 2012  | 5C           | 9        | 5             | 5–21             |

1058 \*reference species not collected at Dongsha

1059

1060

Table 2. Dongsha Atoll *Sinularia*. Loci and SNP summary statistics of pyRAD simulations at two different clustering thresholds (*c*), three different levels of taxon occupancy per locus (*m*), and two different levels of shared polymorphic sites (*p*). Minimum and maximum loci obtained for one individual are included as well as total loci obtained across all individuals. Total number of variable SNPs (Var), parsimony informative SNPs (PI), and unlinked bi-allelic SNPs (BI) are also included.

| (m)      | (c)  | Number of Loci |        |        |            |        |        | Number of SNPs |         |        |            |         |        |
|----------|------|----------------|--------|--------|------------|--------|--------|----------------|---------|--------|------------|---------|--------|
|          |      | Min            | Max    | Total  | Min        | Max    | Total  | Var.           | PI      | BI     | Var.       | PI      | BI     |
| Clade 4  |      | <i>p10</i>     |        |        | <i>p25</i> |        |        | <i>p10</i>     |         |        | <i>p25</i> |         |        |
| 1.0      | 0.90 | 73             | 73     | 73     | 154        | 154    | 154    | 382            | 78      | 63     | 1,358      | 617     | 144    |
|          | 0.85 | 93             | 93     | 93     | 185        | 185    | 185    | 563            | 255     | 83     | 1,675      | 778     | 175    |
| 0.75     | 0.90 | 1,570          | 2,391  | 2,552  | 3,139      | 5,331  | 5,515  | 17,690         | 10,505  | 2,448  | 48,301     | 28,211  | 5,411  |
|          | 0.85 | 1,869          | 2,869  | 2,958  | 3,791      | 6,113  | 6,343  | 22,936         | 14,026  | 2,851  | 60,232     | 36,467  | 6,236  |
| 0.50     | 0.90 | 3,391          | 9,742  | 10,813 | 6,923      | 24,178 | 26,861 | 70,048         | 38,239  | 10,490 | 214,870    | 121,983 | 26,532 |
|          | 0.85 | 4,347          | 10,341 | 11,540 | 8,693      | 25,221 | 28,179 | 86,607         | 49,558  | 11,225 | 251,615    | 147,779 | 27,860 |
| Clade 5C |      |                |        |        |            |        |        |                |         |        |            |         |        |
| 1.0      | 0.90 | 115            | 115    | 115    | 143        | 143    | 143    | 885            | 212     | 104    | 1,222      | 356     | 132    |
|          | 0.85 | 123            | 123    | 123    | 154        | 154    | 154    | 908            | 229     | 109    | 1,325      | 385     | 140    |
| 0.75     | 0.90 | 2,500          | 4,174  | 4,306  | 4,060      | 6,675  | 7,083  | 52,325         | 31,844  | 4,276  | 91,810     | 57,263  | 7,051  |
|          | 0.85 | 2,781          | 4,793  | 4,968  | 4,491      | 7,771  | 8,060  | 62,057         | 38,113  | 4,930  | 106,548    | 66,726  | 8,022  |
| 0.50     | 0.90 | 6,210          | 11,587 | 13,189 | 9,439      | 20,926 | 23,946 | 171,091        | 104,614 | 13,141 | 329,837    | 205,990 | 23,898 |
|          | 0.85 | 5,381          | 11,697 | 13,281 | 9,329      | 20,582 | 23,484 | 175,558        | 108,258 | 13,225 | 327,211    | 205,557 | 23,428 |

Table 3. SNAPP results for different species delimitation models for Dongsha Atoll *Sinularia* clades 4 and 5C. Rank of most likely species model based on Bayes Factor delimitation is indicated.

| Model           | MLE   | BF   | Rank |
|-----------------|-------|------|------|
| <i>Clade 4</i>  |       |      |      |
| ONESPP          | -1119 | --   | 1    |
| TWOSPP          | -1450 | -662 | 6    |
| THREESPP        | -1327 | -416 | 5    |
| mtMutS          | -1300 | -362 | 3    |
| DAPC/28s        | -1310 | -382 | 4    |
| DAPC+1          | -1291 | -344 | 2    |
| <i>Clade 5C</i> |       |      |      |
| ONESPP          | -1298 | --   | 1    |
| TWOSPP          | -1660 | -724 | 7    |
| FOURSPP         | -1594 | -592 | 4    |
| mtMutS          | -1625 | -654 | 6    |
| 28s             | -1607 | -618 | 5    |
| DAPC            | -1544 | -492 | 3    |
| DAPC+1          | -1543 | -490 | 2    |

MLE=Marginal Likelihood Estimate

BF=Bayes Factor.
